1 ***PFKFB4 control of Akt signaling is essential for premigratory and***  
2 ***migratory neural crest formation.***

3  
4 Ana Leonor Figueiredo<sup>1,2</sup>, Frédérique Maczkowiak<sup>1,2</sup>, Caroline Borday<sup>1,2</sup>, Patrick Pla<sup>1,2</sup>,  
5 Meghane Sittewelle<sup>1,2</sup>, Caterina Pegoraro<sup>1,2</sup>, and Anne H. Monsoro-Burq<sup>1,2\*</sup>.

6  
7 <sup>1</sup> Univ. Paris Sud, Université Paris Saclay, CNRS UMR 3347, INSERM U1021, Centre  
8 Universitaire, 15, rue Georges Clémenceau, F-91405, Orsay, France.

9 <sup>2</sup> Institut Curie Research Division, PSL Research University, CNRS UMR 3347, INSERM U1021.

10  
11  
12  
13 \* author for correspondence

14 e-mail: [anne-helene.monsoro-burq@curie.fr](mailto:anne-helene.monsoro-burq@curie.fr)

15  
16  
17 **Key words.**

18 Neural crest, *Xenopus laevis* embryo, PFKFB, 6-phosphofructo-2-kinase/fructose-2,6-  
19 bisphosphatase, AKT, migration, glycolysis, neural plate border.

24 **Summary statement.**

25 PFKFB4 controls neural crest final specification and migration by regulation of AKT signaling or  
26 glycolysis.

27

28 **Abstract.**

29 Neural crest (NC) specification comprises an early phase, initiating immature NC progenitors  
30 formation at neural plate stage, and a later phase at neural fold stage, resulting into functional  
31 premigratory NC, able to delaminate and migrate. We found that the NC-GRN triggers up-regulation  
32 of *pfkfb4* (6-phosphofructo-2-kinase/fructose-2,6-bisphosphatase 4) during this late specification  
33 phase. As shown in previous studies, PFKFB4 controls AKT signaling in gastrulas and glycolysis rate  
34 in adult cells. Here, we focus on PFKFB4 function in NC during and after neurulation, using time-  
35 controlled or hypomorph depletions *in vivo*. We find that PFKFB4 is essential both for specification of  
36 functional premigratory NC and for its migration. PFKFB4-depleted embryos fail activating *n-cadherin*  
37 and late NC specifiers, exhibit severe migration defects, resulting in craniofacial defects. AKT  
38 signaling mediates PFKFB4 function in NC late specification, while both AKT signaling and glycolysis  
39 regulate migration. These findings highlight novel and critical roles of PFKFB4 activity in later stages  
40 of NC development, wired into the NC-GRN.

## 41 INTRODUCTION

42 The neural crest (NC) is a highly migratory and multipotent cell population of vertebrate  
43 embryos, forming an array of differentiated cells: peripheral neurons and glia, pigment cells,  
44 craniofacial skeleton, cardiac structures, and endocrine cells (Bronner and LeDouarin, 2012). NC  
45 development initiates during gastrulation, at the edges of the neural plate, and continues until late  
46 organogenesis. In early gastrulas, NC development is triggered by signals from the adjacent neural  
47 plate, non-neural ectoderm, and underlying mesoderm (Saint-Jeannet et al., 1997; Wilson et al.,  
48 1997; Neave et al., 1997, Chang and Hemmati-Brivanlou 1998; LaBonne and Bronner-Fraser 1998;  
49 Villanueva et al., 2002; Monsoro-Burq et al., 2003; Milet and Monsoro-Burq 2012). These signals  
50 specify the neural border (NB), a transition area located across the neural plate and the non-neural  
51 ectoderm (Meulemans & Bronner-Fraser 2004; Monsoro-Burq et al. 2005; Basch et al. 2006). In  
52 gastrulas, the NB is a mixed territory comprising prospective dorsal neural tube cells, NC and cranial  
53 placode progenitors (Steventon et al. 2009, Pegoraro & Monsoro-Burq 2012).

54 In late gastrulas and early neurulas (i.e. neural plate stage), NC specification is initiated within  
55 the NB, upon the coordinated action of WNT signaling and several transcription factors (NB  
56 specifiers) broadly activated in this region (PAX3/7, ZIC1/2, MSX1/2, TFAP2A, GBX2, HES4, AXUD,  
57 cMYB; Luo et al. 2003; Brewer et al. 2004; Monsoro-Burq et al. 2005; Sato et al. 2005; Khadka et al.  
58 2006; Basch et al. 2006; Nichane et al. 2008; Li et al. 2009; Maczkowiak et al. 2010; de Croz e et al.  
59 2011; Simoes-Costa et al. 2015). This initial phase of NC specification is marked by locally enhanced  
60 expression of *tfap2a* and *hes4/hairy2*, and low-level *snail2* and *foxd3*, two transcription factors  
61 marking the early NC progenitors, i.e. lineage-restricted cells being still functionally immature (Saint-  
62 Jeannet et al. 1989; Essex et al. 1993; Nieto et al. 1994; Mayor et al. 1995; Mancilla and Mayor,  
63 1998; Nichane et al., 2008; de Croz e et al., 2010). During the second half of neurulation, as neural  
64 folds elevate, the immature NC is further specified into functional premigratory NC, ready to undergo  
65 epithelium-to-mesenchyme transition (EMT) and migration. The fully specified NC (mature) is  
66 characterized by late markers *sox10*, *twist* and *tfap2e*, and enhanced *ets1* and *cmyc* (Bellmeyer et al.  
67 2003; Th eveneuve et al. 2007). In late neurulas, after EMT, NC cells migrate as groups or as individual  
68 cells along defined embryonic routes, still expressing *sox10* and *twist* (Thevenneau & Mayor 2012).  
69 Importantly, TWIST is essential for the coordinated action of EMT regulators SNAIL1/2 (Lander et al.  
70 2013) while enhanced survival properties favors the NC extensive migration (Vega et al., 2004).  
71 Finally, the cranial NC populating the craniofacial buds differentiates into mesenchyme, cartilage and  
72 bone (Douarin & Kalcheim 1999).

73 We found that *pfkfb4* (*6-phosphofructo-2-kinase/fructose-2,6-bisphosphatase*) expression was  
74 upregulated during late NC specification/maturation phase (neural fold stage). In adult cells, PFKFB1-  
75 4 control the levels of fructose-2,6-bisphosphate, the strongest allosteric activator of  
76 phosphofructokinase1, which regulates the rate-limiting reaction of glycolysis (Okar et al. 2001; Pilkis  
77 et al. 1995, Fig.S1). Higher PFKFB4 levels stimulate glycolysis rate. Moreover, in embryos, we have  
78 previously shown that PFKFB4 is essential for global ectoderm regionalization. In this context,  
79 PFKFB4 acts independently of glycolysis by controlling AKT signaling (Pegoraro et al. 2015). Here,  
80 we found that the NC-GRN controls elevated *pfkfb4* expression in the late premigratory NC. Using  
81 either constitutive or time-controlled PFKFB4 depletions, and time-controlled pharmacological  
82 inhibition of PI3K-AKT signaling *in vivo*, we show that PFKFB4 and AKT signaling regulate a timely  
83 switch between lineage-restricted but immature NC and functional premigratory NC. Furthermore,  
84 after EMT, PFKFB4, through PI3K-AKT signaling and glycolysis, controls NC migration. These results  
85 suggest that NC developmental progression relies upon continuous PFKFB4 function, as a novel NC-  
86 GRN actor, whose activity is relayed by AKT signaling.

## 87 RESULTS

### 88 ***Pfkfb4* expression labels the neural crest during second half of neurulation.**

89 As in all vertebrate embryos, in *Xenopus laevis*, NB induction starts in early gastrulas (st.10.5  
90 Nieuwkoop-Faber, 1994), as characterized by early expression of *pax3*, *zic1/2*, and *hes4* lateral to the  
91 neural plate (Monsoro-Burq et al., 2005; Nichane et al., 2008). NC specification is initiated at the end  
92 of gastrulation (st.11.5-12), and is marked by early NC specifiers as *snail2* and *foxd3* at neural plate  
93 stage (st.12-14, Fig.1A). NC specification is further established (maturation phase) during neural fold  
94 stage (st.14-18), by activation of a later set of NC specifiers and EMT inducers (*sox10*, *twist*), and by  
95 increased expression of early NC specifiers (Fig.1B). Upon neural tube closure (st.17-19), cranial NC  
96 cells undergo EMT and initiate migration to populate the branchial arches and craniofacial areas  
97 around tailbud st.24 (Fig.1C).

98 Among novel genes enriched in premigratory NC, we found *pfkfb4* clustered with *snail2* and  
99 *sox10* (Plouhinec et al. 2014). At neural plate stage, *pfkfb4* was expressed at low levels throughout  
100 the dorsal ectoderm (Fig.1D). At early neural fold stage (st.14), later than *snail2* initiation, *pfkfb4* was  
101 strongly enriched in the NB/NC (Fig.1E,F,L-N). At the end of neurulation (st.18), NC *pfkfb4* mRNA  
102 levels, but not *pfkfb1-3* levels, were elevated by 1.5-fold compared to whole embryo expression  
103 (Fig.1J, Fig.S2). The premigratory NC expressed 6.4-fold higher *pfkfb4* levels than the adjacent  
104 anterior neural fold, which forms forebrain and placodes. Finally, *pfkfb4* was expressed during NC  
105 EMT and early migration but decreased as NC cells reached ventral craniofacial areas (Fig.1H-I). This  
106 pattern contrasted with blastula and gastrula stages, when low *pfkfb4* levels were detected in the  
107 entire dorsal ectoderm, encompassing the neural plate, the NB, and part of the non-neural ectoderm  
108 (Pegoraro et al. 2015). Thus, *pfkfb4* was enriched in premigratory NC, during its maturation period,  
109 NC EMT and early migration (st14-22).

110

### 111 **PFKFB4 activation promotes neural crest formation at the neural border.**

112 Experimental increase of PFKFB4 levels *in vivo* led to a moderate but reproducible increase of  
113 the NB and early NC marker expression at the end of neural plate stage (st.14, *pax3*, *zic1*, *snail2*,  
114 Fig.1O-Q, Table.S2). At the end of neurulation (st.18), the definitive premigratory NC area was also  
115 enlarged (Fig.1R,S). In contrast, neural plate specification, anterior-posterior regionalization (*sox2*,  
116 *otx2*, *hoxb9*) and non-neural ectoderm differentiation (*keratin-K81*) were not affected in late neurulas.  
117 We observed a transient and moderate increase of the *sox2*-positive area at mid-neurula stage, which  
118 was probably related to the enlarged NB, which transiently expresses *sox2* early on (Fig.1U,W-Y,

119 Table.S2). Mesoderm formation seemed unaffected (*myod*, Fig.1V). At tailbud stage (st.22-24),  
120 migrating NC streams were enlarged with similar ventral migration distance compared to the  
121 contralateral control side (Fig.1T,Z). Altogether, *pfkfb4* expression and PFKFB4 gain-of-function  
122 phenotype suggested a positive role in NC development. We did not observe ectopic expression of  
123 NC markers, in the neural plate or the non-neural ectoderm, suggesting that PFKFB4 was not  
124 sufficient to alter specification of adjacent ectoderm cells.

## 125 **Moderate PFKFB4 depletion affects craniofacial development *in vivo*.**

126 In order to deplete PFKFB4 activity in gastrulas, we previously used a splice-blocking  
127 morpholino oligonucleotide (PFKFB4MO, Pegoraro et al. 2015), using 20ng per blastomere in 2-cell-  
128 stage embryos. *Pfkfb4* mRNA levels were decreased by 60% (hereafter called severe depletion).  
129 Phenotypes were validated using an ATG-targeting and a mismatch morpholino, dose-response, and  
130 rescue experiments (Blum et al. 2015). In severe depletion conditions, we observed a developmental  
131 blockade before neural fold stage, all dorsal ectoderm cells remaining in an immature progenitor  
132 status, while further specification was blocked. Here, in order to analyze later PFKFB4 functions  
133 during NC formation, we used two strategies to bypass this early developmental arrest. Firstly, we  
134 used low-level PFKFB4 depletion, which no longer blocks ectoderm global developmental progression  
135 and allows neurulation to proceed. Secondly, we have used photo-inducible morpholinos, to control  
136 PFKFB4 depletion timing *in vivo*, and avoid affecting early development.

137 Based on *pfkfb4* enhanced NC expression, we hypothesized that NC development required  
138 maintenance of high PFKFB4 levels, while other tissues may develop normally under mild PFKFB4  
139 depletion conditions. Using decreasing PFKFB4MO doses, we created mild hypomorph conditions  
140 (about 35% decrease in *pfkfb4* mRNA level, Fig.2A), and monitored the craniofacial morphology and  
141 pigmentation phenotype of st.45 tadpoles (Fig.2B-E). We found that low-level depletion (injecting 5ng  
142 of MO into one dorsal-animal blastomere, at the 4-cell stage or any equivalent combination at other  
143 developmental stages), resulted in a morphologically normal gastrulation and neurulation but caused  
144 a significant reduction of head structures on the injected side, compared to the uninjected side  
145 (Fig.2B). Pigment cells were present on both sides of the tadpoles and appeared unperturbed. Lower  
146 morpholino doses (2.5ng or 1ng in one of four blastomeres) did not significantly alter embryo  
147 morphology. Higher doses caused early death of the injected cells (this apoptosis was rescued by  
148 adding *pfkfb4* mRNA as described in Pegoraro et al., 2015). With the low-level PFKFB4 depletion, we  
149 checked that injected cells were not subjected to increased cell death compared to control cells in the  
150 vast majority of the embryos (Fig.S3). Moreover, neither ventral injections of PFKFB4MO nor dorsal

151 injections of a non-related MO (even at high doses) caused cell death, excluding non-specific effects  
152 of morpholino injection (Fig.S3). These observations confirmed the hypothesis that NC development  
153 was specifically affected by low-level depletion of PFKFB4. Therefore, using these hypomorph  
154 PFKFB4 conditions, we could explore the roles of PFKFB4 in NC derivatives formation *in vivo*. All  
155 further experiments, except for photo-morpholinos, were thus conducted using this low MO  
156 concentration.

157 The NC generates most craniofacial structures including craniofacial skeleton, mesenchyme  
158 and soft tissues around the eyes. Following moderate PFKFB4 depletion, dorsal and ventral  
159 craniofacial structures were globally smaller. On the morphant side, branchial cartilages were strongly  
160 reduced while Meckel's and ceratohyal cartilages were moderately diminished (Fig.2C-E). Eyes were  
161 also affected, with grossly normal shape but reduced size. Since *pfkfb4* is present at low levels in the  
162 neural plate early on (Fig.1), this could be due to a cell autonomous defect in the optic vesicles  
163 forming from the neural plate. Alternatively, CNCC defects could influence the developing eye (Bailey  
164 et al. 2006; Lwigale 2015). Hence, the NC-derived craniofacial structures were severely affected  
165 when PFKFB4 levels were downregulated moderately while most other structures were normal.

#### 166 **PFKFB4 depletion affects premigratory neural crest specification and NCC migration.**

167 We then investigated which steps of NC formation were affected by PFKFB4 low-level  
168 depletion. At early neural fold stage, *snail2* expression was very low to absent on the injected side  
169 (Fig.3A,L-first bar, Table.S2). This defect was a delay, since, by the end of neurulation, most embryos  
170 expressed *snail2* normally (Fig.3B,L). In theory, delayed *snail2* activation could be followed by either  
171 the later onset of the entire NC specification cascade or by globally defective NC development. To  
172 assess definitive NC specification at the end of neural fold stage, we analyzed expression of late NC  
173 specification markers, *sox10* and *twist*. While *sox10* was normally activated (Fig.3C), *twist* expression  
174 was severely defective (Fig.3D) and *hes4*, marking immature premigratory NC was increased (Fig.3E,  
175 Table.S2). In contrast, neural ectoderm, non-neural ectoderm and paraxial mesoderm specification  
176 were unaffected (*sox2*, *ep. ker.*, *myod*, Fig.3I-L, Table.S2). Neurulation and neural tube closure were  
177 slightly delayed on the injected side, but neural tube eventually closed (Fig.3.G,I). Importantly, while  
178 some neural border markers were expressed normally at the time of neural tube closure (e.g. *msx1*,  
179 Fig.3.H), others were moderately (*zic1*) to strongly increased (*pax3*) suggesting that the NC cells had  
180 partially retained an immature NB-like character, at a developmental stage when they should have  
181 been specified into functional premigratory NC (Fig.3H,I).

182 After neural tube closure and NC delamination, low-level PFKFB4 depletion resulted in  
183 severely defective NC migration, both with diminished expression of migrating NC markers (*twist*,  
184 *sox10*), and decreased migration distance towards the facial areas of the cells expressing these  
185 markers (Fig.3M-S). Although the percent of embryos with abnormal *twist* expression was slightly  
186 lower than at the end of neurulation (Fig.3S-st.24, Fig.3L-st.18), these results indicated that defects  
187 and delay in premigratory NC specification were not compensated at the subsequent stage of NC  
188 migration. At this stage, the central nervous system and the optic vesicle were grossly normal (*sox2*,  
189 Fig.3R). When PFKFB4 morphant phenotype specificity was assessed, by co-injecting PFKFB4MO  
190 with *pfkfb4* mRNA, the morphant phenotype was rescued during NC specification and migration  
191 (Fig.3S, Fig.S4, and not shown).

192 Altogether, these results indicated that a moderate loss of PFKFB4 activity resulted in a strong  
193 impediment of NC development. The NC territory was established, identified by *sox10* expression and  
194 outlined by *msx1* expression (Fig.3C,H). However, its specification was delayed at neural plate stage  
195 (*snail2*), which was incompletely compensated at late neural fold stage (defective *twist*, increased  
196 *hes4*), accompanied by the retention of NB-like character (increased *pax3*) in premigratory NC. This  
197 was followed by defective migration of *sox10/twist*-expressing NCC in tailbud stage embryos. As a  
198 result, fewer *twist*- or *sox10*-positive cells populated the craniofacial buds. These alterations were  
199 sufficient to explain the morphological craniofacial defects observed at st. 45 (Fig.2). However, using  
200 the constitutively active PFKFB4MO, we could not distinguish between an early need for PFKFB4  
201 during NC specification, causing defective NC migration, and a continuous need for PFKFB4 activity  
202 during NC specification and migration.

### 203 **Inducible PFKFB4 depletion affects neural crest specification and its migration *in vivo*.**

204 To understand PFKFB4 function at each step of NC formation, we set up an inducible  
205 knockdown strategy, using a UV-cleavable sense morpholino (PFKFB4-PhMO) that blocked *pfkfb4*  
206 antisense MO until UV exposure. Although more fragile, we injected albino embryos for UV  
207 penetration. The uninjected side controlled for non-specific UV effects. As control, severe PFKFB4MO  
208 constitutive depletion led to abolished or severely decreased *twist* expression (in 80% and 17% of  
209 embryos, Fig.4A-C,H). PFKFB4-PhMO/MO co-injections efficiently blocked the severe morphant  
210 phenotype (uninduced embryos, u.i.): *twist* was normally expressed in 60% of st.18 embryos. Despite  
211 minimal ambient light throughout experiments, we observed some leakage in the PhMO/MO u.i.  
212 condition, leading to 22.5% of embryos with severe decrease in *twist* expression and 17.5% with mild  
213 defects. However, after UV exposure upon injection (a.i., illumination at the 4-cell stage), *twist*



214 expression decreased significantly on injected side in 73% of embryos (Fig.4H). The lower efficiency  
215 of the PhMO/MO a.i. condition compared to the constitutive PFKFB4MO phenotype, leading to only  
216 26% of embryos with severe *twist* blockade and 47% with mild defects, could be due to a partial  
217 *pfkfb4-PhMO* cleavage, leading to a hypomorph phenotype. Indeed, the embryos exhibited  
218 malformations similar to the ones observed at low doses with constitutive depletion (Fig.3).

219

220 To study PFKFB4 role during NC specification, embryos were UV-illuminated at the end of  
221 gastrulation (st.12.5), and analyzed at late neural fold stage (st.18). Before induction, development  
222 appeared normal (*sox2*, *ep.ker.* expression, not shown). PFKFB4 knockdown from st.12.5 resulted in  
223 a significant *twist* downregulation (Fig.4D-H) compared to injected but uninduced embryos. Therefore,  
224 PFKFB4 plays a specific role during NC specification, distinct from its early function on ectoderm  
225 patterning during gastrulation. Moreover, this effect mirrors the hypomorph phenotype observed with  
226 the mild PFKFB4 depletion (Fig.3).

227

228 PFKFB4 knockdown was then induced at late neural fold stage, as NC cells have completed  
229 specification, maturation and initiated EMT (st.18). Before illumination, development was mainly  
230 normal, despite slightly decreased *twist* expression (u.i., Fig.4H). In st.24 tadpoles, we analyzed *twist*  
231 expression, NC streams shape and migration distance from the dorsal midline. *Twist* was normal in  
232 embryos injected with *lacZ* or PhMO/MO uninduced, while the injected cells were lacking (eliminated  
233 after cell death) in PFKFB4MO-injected embryos (Fig.4I-N,U). After st.18 photo-induction, *twist* was  
234 significantly altered in 69% of embryos (Fig.4O-U). For the milder phenotype ("migration", 21%),  
235 tadpoles presented a modestly reduced migration distance (13% reduction), with a robust *twist*  
236 expression but smaller NC streams (17% area reduction). This limited effect was reproducible and  
237 statistically significant, compared to variations observed in *lacz*-injected embryos or the injected  
238 embryos classified as normal (Fig.4O,P,V,W). The second phenotype ("migration and staining",  
239 28.5%) presented similarly reduced migration distance (14% reduction) but more intense decrease in  
240 NC streams area (34% smaller) and lower *twist* staining intensity (Fig.4Q,R,V,W). Finally, 19% of the  
241 embryos exhibited strongly reduced *twist* expression ("severe staining defect"), with 36% reduced  
242 area, the low staining preventing measure of migration distance (Fig.4S,T,V,W). Hence, depleting  
243 PFKFB4 after NC specification, at the time of EMT, affected *twist* expression, the size of NC streams,  
244 and NC migration distance.

245

246 Together, these results demonstrated a requirement for PFKFB4 function at two successive  
247 and distinct steps of NC development: patterning of mature NC during neurulation and NC migration

248 at tailbud stage. Moreover, these effects closely mimicked those observed after low-level PFKFB4  
249 depletion.

250

### 251 **PFKFB4 controls AKT signaling in premigratory NC.**

252 PFKFB4 regulation of glycolysis, as seen in adult cells, was not involved in neural crest late  
253 specification, since glycolysis blockade during neural fold stage did not alter *twist* expression (Fig.S5,  
254 other markers not shown). In order to understand how PFKFB4 may affect NC late specification, we  
255 assessed cell signaling parameters and cell proliferation in premigratory NC. In gastrulas, PFKFB4  
256 levels impact PI3K-AKT signaling. Here, to address precisely the level of AKT signaling in developing  
257 neural crest progenitors, we dissected out either the neural border territory at the end of neural plate  
258 stage, or the premigratory cranial neural crest at the end of neural fold stage, and measured phospho-  
259 SER473-AKT levels in control and PFKFB4 hypomorph conditions. AKT signaling was specifically  
260 decreased in morphant NC progenitors compared to controls (Fig.5A)

261 AKT signaling regulates many aspects of cell homeostasis, including cell proliferation. We next  
262 wondered if the rate of cell proliferation was affected in morphant NC, and if the pool of *myc*-positive  
263 NC stem cells was normal (Bellmeyer et al. 2003). After EdU incorporation, we observed normal cell  
264 proliferation on the morphant side (Fig.5B). *Cmyc* expression was normal on the morphant side, when  
265 *twist* was defective in sibling embryos (Fig.5C,D). Together, these results suggested that the  
266 morphant territory generates a rather normal pool of NC stem cells, suggesting that the phenotype  
267 relies on genuine patterning defects within a partially specified NC domain.

268 To assess if diminished AKT signaling was sufficient to affect NC specification and maturation,  
269 and to phenocopy the morphant phenotype, we treated embryos with PI3K-AKT inhibitor (LY294002,  
270 40-80 $\mu$ M). As a comparison, we used a MAPK/ERK inhibitor (UO126, 40-80 $\mu$ M) since both AKT and  
271 MAPK signaling pathways are often activated downstream of tyrosine kinase receptor signaling. Each  
272 treatment was checked for inhibition of p-ERK and p-AKT (on whole embryo lysates, not shown).  
273 Embryos were treated exclusively during neural fold stage (from st.14 to st.18). Inhibiting PI3K-AKT  
274 signals blocked *twist* but not *cmyc* induction. In contrast ERK inhibitor had no effect on either gene  
275 expression (Fig.5E-H). This result showed that AKT signaling was specifically needed during the last  
276 phase of premigratory NC maturation. When AKT function was disrupted, a normal pool of *cmyc*-  
277 positive NC stem cells formed but they failed expressing the late NC specifier *twist*.

278 Finally, when a constitutively active form of AKT was co-injected with PFKFB4MO, *twist*  
279 specification defects were rescued, demonstrating that the main cause of PFKFB4 morphant  
280 phenotype prior to migration, was due to altered AKT signaling (Fig.5I-J).

### 281 **PFKFB4 depletion affects neural crest EMT and migration in a cell autonomous manner.**

282 To understand the defects during NC EMT and migration upon PFKFB4 low-level depletion,  
283 we reasoned that morphant NC cells, with delayed or incomplete specification (Fig.3), might require  
284 longer time than wild-type NC to mature and undergo migration. Additionally, interactions between the  
285 NC and its *in vivo* environment are essential for migration. Using the more robust pigmented frog  
286 embryos, we challenged the ability of morphant NCC to migrate in a wild-type host environment  
287 (Fig.6). We implanted GFP-labeled premigratory morphant NC into a stage-matched wild-type host  
288 and followed cell migration *in vivo*. In contrast to the control wild-type grafts which healed within 20  
289 minutes after transplantation, the morphant tissue healed with difficulty: most of the donor tissue failed  
290 to adhere to the host tissues, even as long as two hours post grafting (not shown). Moreover, after  
291 healing, the vast majority of the grafted morphant cells failed to migrate although occasional cells  
292 could be traced in the mandibular arch area (Fig.6C-D, compare to wild-type cells in A,B). This  
293 phenotype was qualitatively similar to the defects observed in the morphant embryos (Fig.4), either  
294 with constitutive or inducible morpholinos. In this transplantation assay, however, the lack of migration  
295 was observed in a higher number of cases, possibly because of the additional healing defect revealed  
296 by the assay. This challenge revealed that PFKFB4 morphant cells displayed altered healing and  
297 survival ability upon EMT and migration stage.

298 We further analyzed the fate of the morphant cells *in vivo* with another strategy. In order to  
299 avoid interference with altered healing properties, we traced the injected cells with *gfp* mRNA co-  
300 injected with PFKFB4MO, by targeting dorsal-animal blastomere D1.2 at stage 8 to 16 cells, which  
301 mostly forms dorsal neural tube and NC progenitors (Moody et al., 1987). We followed the fate of NC  
302 progenitors, by selecting embryos with GFP-positive premigratory NC at the end of neurulation (st.18,  
303 Fig.6F-H). In these conditions, without further experimental manipulation of the injected cells, we find  
304 that the control cells undergo EMT, migrate and populate efficiently craniofacial areas as expected,  
305 while morphant cells fail to do so in a dose dependent manner. In contrast, the morphant cells  
306 contribute to brain and eye as efficiently as control cells (Fig.6G,I,J). We concluded that the defective  
307 NC specification and maturation, observed at st.18, was not compensated later on, even when  
308 morphant cells face a wild-type environment, and that a lower PFKFB4 activity resulted in a cell-  
309 autonomous alteration of NC ability to undergo EMT and migration *in vivo*.

310 To understand the cellular and molecular basis of morphant NC phenotype, we tested  
311 adherence, EMT and migration on fibronectin *in vitro* (Fig.6K-R). This assay was done using earlier  
312 tissue than in previous publications, i.e using neural border at st. 14 instead of premigratory NC st.17-  
313 18, which has already started EMT. Doing so, this assay allows visualizing separately adherence a  
314 few minutes after plating, then EMT about 2 hours after plating, and finally cell migration on the  
315 fibronectin substrate starting 3,5-4hours after plating (Fig.6K-N). Morphant neural folds were thus  
316 dissected out at the end of neural plate stage (st.14). They failed to adhere efficiently on fibronectin,  
317 did not undergo EMT (O-P) and poorly migrated (Q-R), while wild-type neural folds adhered,  
318 underwent a very clear EMT (K-L), dispersed and actively migrated (Fig.6M-N)). A key parameter for  
319 NC EMT is the up-regulation of *n-cadherin* expression prior to EMT (Theveneau & Mayor 2012). We  
320 found that *n-cadherin* expression levels were significantly lower in morphant NB (st.14) and NC (st.18)  
321 compared to stage-matched controls (Fig.6E).

322 We concluded that lower PFKFB4 activity resulted in premigratory NC with defective *n-*  
323 *cadherin* levels. These cells were unable to undergo EMT on a fibronectin substratum *in vitro*,  
324 exhibited poor ability to adhere, heal, or migrate upon grafting in wild-type host environment *in vivo*.  
325 The morphant cells remained integrated into adjacent tissues such as central nervous system or eye.  
326 These altered capacities were sufficient to explain the late phenotype in tadpoles, with  
327 underdeveloped craniofacial structures.

328 **At tailbud stage, PFKFB4 depletion alters both glycolysis and AKT signaling, which together**  
329 **impact NC migration.**

330 PFKFB4 depletion decreased glycolysis in embryos (Fig.S5). To understand PFKFB4  
331 depletion phenotype during NC migration, we blocked either glycolysis or AKT signaling from EMT  
332 stage (st.18) to migration into branchial buds (st.24) (Fig.7, S6). Glycolysis was blocked using 2-  
333 deoxyglucose (2DG), a non-hydrolysable glucose. The PI3K inhibitor LY294002 was used at various  
334 doses to block PI3K-AKT signaling. Efficiency of each treatment was monitored (Fig.S5). We found  
335 that both glycolysis and AKT phosphorylation blockade from st.18 to st.24, resulted into severe  
336 disruption of NCC migration, (*twist*, *sox9*, *sox10*, Fig.7, Fig.S6). The effects of LY294002 were dose-  
337 dependent (not shown). While glycolysis blockade seemed to mainly affect NC streams morphology,  
338 AKT inhibition also affected general embryo development (not shown). In order to test for delayed  
339 NCC migration and for general treatment toxicity, embryos were transferred in drug-free medium from  
340 tailbud st.24 until late tadpole st.45. In these conditions, potential delays would be compensated,  
341 while general toxicity would lead to embryo death. Here, embryo survival was normal. St.45

342 craniofacial morphology was analyzed. Relative to body size, heads were smaller and visceral  
343 cartilage elements were severely underdeveloped as observed upon PFKFB4 depletion, especially  
344 after AKT signaling blockade. Interestingly, combining both glycolysis and AKT blockade led to  
345 stronger craniofacial phenotype, suggesting cooperation of the two processes (Fig.S6). We concluded  
346 that blocking AKT signaling or, with less efficiency, blocking glycolysis, phenocopied PFKFB4  
347 morphant phenotype during NC migration. Both AKT signaling and glycolysis were thus needed for a  
348 large number of NCC to populate the branchial arches and head structures.

349 Since AKT blockade seemed most effective in mimicking PFKFB4 depletion, we attempted to  
350 rescue the craniofacial phenotype by co-injecting *caAkt* mRNA with PFKFB4MO. By st.45-46, we  
351 observed that constitutive activation of AKT signaling alone did not affect craniofacial development  
352 (Fig.7N,P). While morphant injected sides were severely reduced (Fig.7M,P), most tadpoles co-  
353 injected with PFKFB4MO and *caAkt* were symmetrical (Fig.7O,P). This experiment demonstrated that  
354 defects of NC craniofacial derivatives observed upon PFKFB4 depletion were largely due to loss of  
355 AKT phosphorylation and were efficiently compensated by restoring active AKT signaling.

356

### 357 **The NC-GRN regulators control *pfkfb4* activation at the neural-non-neural border.**

358

359 Finally, we analyzed *pfkfb4* upregulation at the edges of the neural plate. We asked if the NC-  
360 GRN actors actively controlled *pfkfb4* expression, as they do for *snail2*, either during early *pfkfb4*  
361 activation in the end of neural plate stage, or in premigratory NC. We used MO-mediated depletions  
362 with well-established morpholinos, dominant-negative constructs (Fig.8) or gain-of-function  
363 experiments (Fig.S7). First, the secreted NC inducers, including WNT and FGF8 signals as well as  
364 modulating BMP signaling, affected similarly *snail2* and *pfkfb4* (Fig.8A-L, Fig.S7). Secondly, we found  
365 that the key transcription factors acting at the NB to specify NC, PAX3 and TFAP2a, were also  
366 essential to establish *snail2* and *pfkfb4* (Fig.8M-T, Fig.S7). In addition, the NC specifier SOX9 was  
367 needed for expression of both genes at the NB and in premigratory NC (Fig.8U-X). All these results  
368 indicated that increased *pfkfb4* expression in the NC progenitors is actively promoted by the NC-GRN  
369 regulators, as for more classical partners of the network (e.g. *snail2*). Thus, our results show that  
370 PFKFB4 key function, which mainly relies on ensuring proper AKT signaling in NC progenitors, is  
371 encoded within the NC-GRN. PFKFB4 could be a major intermediate actor in NC control by WNT-  
372 FGF-BMP signals.

373

## 374 **DISCUSSION**

375 In this study, we have evidenced that PFKFB4 activity is required continuously during several  
376 key steps of NC formation: during premigratory NC maturation at neural fold stage, and during NC  
377 migration towards the craniofacial buds at tailbud stage. This activity is critical as PFKFB4 depletion  
378 led to hypomorphic craniofacial structures. We showed that the major transcription factors and  
379 signaling pathways that control the NC-GRN, control *pfkfb4* activation in NC progenitors during neural  
380 fold stage, i.e. during the phase of NC maturation. In turn, PFKFB4 controls AKT signaling activity in  
381 NC, which is essential for NC maturation and migration. PFKFB4 is a known glycolysis regulator, and  
382 its depletion in neurulas affected glycolysis. However, at neural fold stage, glycolysis is not required  
383 for NC patterning. In contrast, at tailbud stage, both AKT signaling and glycolysis are important  
384 parameters to ensure NC migration. Finally, restoring AKT signaling compensates PFKFB4 depletion  
385 and results in normal craniofacial development. This indicates that PFKFB4 critical action on NC  
386 development is mainly mediated by its action on AKT signaling (Fig.9).

387

388 The enzyme PFKFB4 is an integral partner of the NC-GRN. While it is ubiquitously expressed  
389 in the dorsal ectoderm at gastrulation stage (Pegoraro et al., 2015), we found that, during neurulation,  
390 *pfkfb4* expression is upregulated in immature NC progenitors, starting at neural fold stage. *Pfkfb4* is  
391 further expressed in the NC initiating their migration (Fig.1. We have shown that the major NC-GRN  
392 regulators, including secreted inducers, NB specifiers, and NC specifiers, control *pfkfb4* expression in  
393 the neural folds (Fig.8). Moreover, depletion of PFKFB4 did not prevent NB specifiers expression but  
394 led to delayed or decreased expression of early (*snail2*) and late (*twist*) NC specifiers (Fig.3).  
395 According to the hierarchical model of the NC-GRN, this indicated that PFKFB4, while not a  
396 transcription factor, acts as a NC specifier (Betancur et al. 2010; Milet & Monsoro-Burq 2012). The  
397 maintenance of *pfkfb4* expression in NC could further involve NC-GRN actors. We have evidenced  
398 that PFKFB4 was needed reiteratively during NC specification and migration (Figs.4,6). Likewise,  
399 WNT and TFAP2a function are also needed at successive steps of NC formation (LaBonne &  
400 Bronner-Fraser 1998; Monsoro-Burq et al. 2005; Simões-Costa et al. 2015; Luo et al. 2003; de Crozé  
401 et al. 2011). Both WNT signals and TFAP2a activate *pfkfb4* expression during NC specification,  
402 suggesting that they could potentially sustain its expression also during later NC development.

403

404 Our data suggest that the main function of PFKFB4 upregulation in premigratory and migratory  
405 NC is to ensure optimal AKT signaling levels in these cells (Fig.5, 7). We also show that blocking AKT  
406 signaling in temporally controlled conditions, affects NC specification and migration independently  
407 (Fig.5, 7). In mouse embryos, a recent study also demonstrated importance of AKT signaling for NC  
408 migration: *Specc1l* mutants or knockdowns exhibit defective neural tube closure and cranial NC

409 migration, with decreased phospho-AKT levels. In this context also, activating PI3K-AKT signaling  
410 rescued the phenotype (Wilson et al. 2016). Together these data suggest that the acute need for  
411 optimal AKT signaling during NC migration might be conserved in amniote and non-amniote  
412 vertebrates.

413

414 The regulation of NC early development by PFKFB4 and AKT was essential to shape the  
415 embryonic head. We propose that it ensures that numerous NCC populated the branchial arches, and  
416 differentiated into cartilage elements with appropriate size rather than impacting the morphogenesis of  
417 these elements (Fig.2, 7). When inducible depletion was performed during NC migration only, cells  
418 eventually migrated almost down to the target tissues, but in smaller numbers (Fig.4). Neural tube  
419 closure and craniofacial defects are an acute societal issue for human health. Hypomorphic  
420 craniofacial structures, especially for the jaw, are observed in many human syndromes, and not yet  
421 linked to specific mutations (reviewed in Heike et al. 1993). Our study shows that impaired AKT  
422 signaling, specifically in the NC progenitors by means of PFKFB4 depletion, creates reduced jaw and  
423 branchial arches structures. This could happen because defects arose at time of NC specification, or  
424 during its migration. Our results thus show that even modest reduction of PFKFB4 levels, or of AKT  
425 signaling, when applied during developmental periods corresponding to critical steps of NC  
426 development, results into severe craniofacial defects. This study highlights the importance of a strict  
427 temporal schedule during NC developmental cascade. This schedule culminates with the EMT and  
428 migration onset of mature NC cells in register with neural tube closure. Optimal AKT signaling,  
429 regulated by high PFKFB4 levels, ensures that no delay in this developmental cascade occurs, that  
430 immature progenitor (NB-like) characters are not retained, and that the ultimate molecular switches  
431 (*twist* and *n-cadherin* expression) are activated in a timely manner, allowing NC to undergo EMT upon  
432 neural tube closure. Later on, PFKFB4 and AKT signaling further optimize the efficiency of NC cell  
433 migration towards the branchial arches. Similarly, AKT signalling was recently shown to up-regulate *n-*  
434 *cadherin* and control NC migration downstream of PDGF-A/PDGFRa (Bahm et al., 2017). This  
435 suggests that various cell inputs use AKT signaling as a hub to control NC formation.

436

437 During NC migration, our results outlined a potential link between PFKFB4, AKT and  
438 glycolysis, because AKT activation rescued the global *pfkfb4* morphant phenotype (lower AKT  
439 signaling and lower glycolysis rate, Fig.5, 7). We conclude that AKT compensates all aspects of  
440 PFKFB4 depletion, directly or indirectly. In adult cancer cells and stem cells, PI3K/AKT signaling  
441 regulates glycolysis, which controls tumor cell motility (Han et al. 2013; Ito & Suda 2014; Courtney et  
442 al. 2015). This mechanism could be involved in NC, as forced AKT signaling rescues PFKFB4

443 phenotype. Comparison with cancer cells further highlight potential common mechanisms. In tumors,  
444 glycolysis enzymes are multifunctional regulators, which impact on cell physiology in addition to their  
445 role in glycolysis. For example, Alpha-enolase regulates PI3K-AKT signaling and downstream cell  
446 EMT regulators such as *snail1* and *n-cadherin* in lung cancer (Fu et al. 2015). PFKFB3 controls PI3K-  
447 AKT in human osteoarthritis cartilage, in adipocytes and in cancer cells (Trefely et al. 2015; Qu et al.  
448 2016). It has been proposed recently, that increased aerobic glycolysis in tumor cells (Warburg effect)  
449 promotes cell survival and cell cycle by stimulating IGF/AKT signaling, in addition to its role in cellular  
450 energy and metabolic intermediate production (Trefely et al. 2015). Our findings highlight a novel  
451 embryonic process, essential for NC EMT and migration, which parallels some mechanisms of cancer  
452 progression. It was shown that migrating NC cells displayed increased resistance to multiple cell  
453 stresses (Vega et al. 2004), ensuring their optimal long distance travel throughout various embryonic  
454 environments. Altogether, our findings show how these properties are acquired and sustained, during  
455 and after premigratory NC maturation, and how they are encoded in the NC-GRN, using  
456 unconventional function of a glycolysis regulator to control AKT signaling.

457

## 458 **MATERIALS AND METHODS**

459 All morpholinos, plasmids and reagents are described in Table S1.

460

### 461 **Embryos, microinjection, NB culture and NC grafts.**

462 Pigmented and albino *Xenopus laevis* embryos were obtained and staged using standard procedures  
463 (Sive et al. 2010) (Nieuwkoop & Faber 1994). European and National Regulation for the Protection of  
464 Vertebrate Animals used for Experimental and other Scientific Purposes were strictly applied (licence  
465 #C91-471-108, *Direction Départementale de Protection de la Population, Courcouronnes, France*).  
466 MOs or mRNAs were co-injected with *NLS-lacZ* mRNA or *histone2B-gfp* mRNA for lineage tracing.  
467 Bgalactosidase activity, revealed in red, marked the injected side. Embryos were injected unilaterally  
468 for WISH/morphology or on both sides (for western-blot and RTqPCR).NB and NC culture/grafting  
469 experiments were described in (Milet & Monsoro-Burq 2014).

470

### 471 **Plasmids and morpholinos**

472 mRNAs were obtained *in vitro* (mMessage mMachine SP6 or T7 kits, Ambion). UV-cleavable  
473 photomorpholino (PhMO) experiments were performed on albino embryos (molecular ratio of  
474 sensePhMO/splice-blockingMO=1.25). PhMO cleavage was induced by 15 min UV exposure using a  
475 HBO 103W/S source.

476



477 **Pharmacological treatments**

478 Glycolysis, MAPK and PI3-Akt signaling were inhibited using 2-deoxyglucose (Sigma), UO126 or  
479 LY294002 (Sigma) respectively, on batches of 50 sibling embryos. Lactate concentration was  
480 measured on 20-40 embryos (L-Lactate Kit, Abcam).

481

482 **Cell proliferation and cell death assays**

483 Cell proliferation was assessed based on EdU incorporation for 2 hours (1mM EdU injected ventrally  
484 into st. 18 embryos, Molecular Probes). Either *gfp* mRNA alone, or PFKFB4MO and *gfp* mRNA were  
485 injected unilaterally. Serial paraffin sections were immunostained. A minimum of 130 cells in the  
486 territory corresponding to the neural crest was counted on the GFP-injected side, compared to the  
487 contralateral side. Cell death was assessed by activated caspase 3 immunostaining *in toto*.

488

489 **Cartilage staining**

490 Embryos were stained with 0.05% Alcian blue, destained in ethanol, rehydrated and cleared with 4%  
491 KOH then in graded glycerol solutions. Cartilages were manually dissected out.

492

493 **Whole-mount in situ hybridization (WISH) and sectioning**

494 We used a procedure optimized for NC (Monsoro-Burq 2007). For sectioning, embryos were  
495 embedded in gelatin-albumin. 30  $\mu$ M thick vibratome transverse sections were cut.

496

497 **Western blotting**

498 Lysates (5-10 whole embryos, 10-15 NBs, NCs or dorsal explants) were prepared using phosphatase  
499 (PhosSTOP, Roche) and protease-inhibitors (Sigma) and analysed by standard western blotting.

500

501 **RT-qPCR**

502 Total RNA was extracted from 3-5 whole embryos or 5 NB, NC or dorsal explants (Sive et al, 2000).  
503 RT-qPCR was performed according to standard procedures using MIQE recommendations. Results  
504 were normalized against the reference genes *odc* and *ef1a*. Primers used to test PFKFB4MO  
505 efficiency span the exon1-exon2 region, i.e. include the exon1-intron1 junction targeted by the  
506 morpholino.

507

508 **Statistical analysis, imaging and image processing.**

509 All experiments were performed at least three times independently (except duplicates for Figs. 5A).

510 The most frequent phenotypes are shown. Graphs indicate the mean percentage of embryos for a

511 given phenotype. NC stream area and NC distance of migration was measured (Fig. 4, ImageJ  
512 software). Error bars = SEM. Student's t-test was used ( $p$ -value  $\leq 0.05$ ). Images were processed with  
513 standard calibration of RGB levels (Photoshop, Gimp).

514

## 515 **ACKNOWLEDGEMENTS**

516 The authors are grateful to all members of the Monsoro-Burq team and to S. Saule for interactive  
517 discussions and R. Harland for gift of plasmids. We specially thank C. Milet, A. Valluet and A. Dolly for  
518 initiating the Akt analysis, C. Pouponnot and A. Eychène for IP experiment. We thank the PICT-IBiSA  
519 imaging facility for technical advice and E. Belloir and C. Alberti for *Xenopus* husbandry.

520

## 521 **COMPETING INTERESTS**

522 The authors declare no competing or financial interests.

523

## 524 **AUTHOR CONTRIBUTIONS**

525 A.L.F, F.M, C.B, P.P, C.P, M.S. and A.H.M.B designed, conducted and analyzed the experiments.

526 A.L.F, F.M, C.B, P.P, M.S. and A.H.M.B have discussed the results and written the manuscript.

527

## 528 **FUNDING**

529 This study was supported by funding from Université Paris Sud, CNRS, Association pour la  
530 Recherche contre le Cancer (ARC PJA20131200185), Agence Nationale pour la Recherche (ANR  
531 Programmes Blanc CrestNet and CrestNetMetabo), and Fondation pour la Recherche Médicale  
532 (FRM, Programme Equipes Labellisées DEQ20150331733, DGE20111123020). A.L. Figueiredo was  
533 a PhD fellow of the French Ministry for Research and Education (MENRT) and Fondation pour la  
534 Recherche Médicale (FDT20140930900). M.S. was a Ph. D. fellow funded by Fondation pour la  
535 Recherche Médicale (ECO20160736105).

536

## 537 **REFERENCES**

538 Aoki, Y. et al., 2003. Sox10 regulates the development of neural crest-derived melanocytes in  
539 *Xenopus*. *Developmental Biology*, 259(1), pp.19–33.

540 Bailey, A.P. et al., 2006. Lens specification is the ground state of all sensory placodes, from which  
541 FGF promotes olfactory identity. *Developmental cell*, 11(4), pp.505–517.

542 Basch, M.L., Bronner-Fraser, M. & Garcia-Castro, M.I., 2006. Specification of the neural crest occurs  
543 during gastrulation and requires Pax7. *Nature*, 441(7090), pp.218–222.

- 544 Bellmeyer, A. et al., 2003. The Protooncogene c-Myc Is an Essential Regulator of Neural Crest  
545 Formation in *Xenopus*. *Developmental Cell*, 4(6), pp.827–839.
- 546 Betancur, P. et al., 2014. Expression and function of transcription factor cMyb during cranial neural  
547 crest development. *Mechanisms of Development*, 132(1), pp.38–43.
- 548 Betancur, P., Bronner-fraser, M. & Sauka-Spengler, T., 2010. Assembling Neural Crest Regulatory  
549 Circuits into a Gene Regulatory Network. *Annual Review in Cell and Developmental Biology*, 26,  
550 pp.581-603
- 551 Blum, M. et al., 2015. Morpholinos: Antisense and Sensibility. *Developmental cell*, 35(2), pp.145–149.
- 552 Bradley, R.S., Espeseth, A. & Kintner, C., 1998. NF-protocadherin, a novel member of the cadherin  
553 superfamily, is required for *Xenopus* ectodermal differentiation. *Current biology : CB*, 8(6), pp.325–  
554 334.
- 555 Brewer, S. et al., 2004. Wnt1-Cre-mediated deletion of AP-2alpha causes multiple neural crest-related  
556 defects. *Developmental biology*, 267(1), pp.135–152.
- 557 Bronner, M.E. & LeDouarin, N.M., 2012. Development and evolution of the neural crest: An overview.  
558 *Developmental Biology*, 366(1), pp.2–9.
- 559 Carballada, R., Yasuo, H. & Lemaire, P., 2001. Phosphatidylinositol-3 kinase acts in parallel to the  
560 ERK MAP kinase in the FGF pathway during *Xenopus* mesoderm induction. *Development*, 128,  
561 pp.35–44.
- 562 Chang, C. & Hemmati-Brivanlou, A., 1998. Neural crest induction by Xwnt7B in *Xenopus*.  
563 *Developmental biology*, 194(1), pp.129–134.
- 564 Courtney, R. et al., 2015. Cancer metabolism and the Warburg effect: the role of HIF-1 and PI3K.  
565 *Molecular biology reports*, 42(4), pp.841–851.
- 566 de Croz e, N., Maczkowiak, F. & Monsoro-Burq, A.H., 2011. Reiterative AP2a activity controls  
567 sequential steps in the neural crest gene regulatory network. *Proceedings of the National Academy  
568 of Sciences of the United States of America*, 108(1), pp.155–60.
- 569 Datta, S.R., Brunet, A. & Greenberg, M.E., 1999. Cellular survival: a play in three Akts. *Genes &  
570 development*, 13(22), pp.2905–2927.
- 571 Douarin, N.L. & Kalcheim, C., 1999. *The Neural Crest*, Cambridge University Press.
- 572 Essex, L.J., Mayor, R. & Sargent, M.G., 1993. Expression of *Xenopus* snail in mesoderm and  
573 prospective neural fold ectoderm. *Developmental dynamics* 198(2), pp.108–122.
- 574 Fu, Q.-F. et al., 2015. Alpha-enolase promotes cell glycolysis, growth, migration, and invasion in non-  
575 small cell lung cancer through FAK-mediated PI3K/AKT pathway. *Journal of hematology &  
576 oncology*, 8 : 22.

- 577 Gammill, L.S. & Sive, H., 2000. Coincidence of otx2 and BMP4 signaling correlates with *Xenopus*  
578 cement gland formation. *Mechanisms of development*, 92(2), pp.217–226.
- 579 Graff, J.M. et al., 1994. Studies with a *Xenopus* BMP receptor suggest that ventral mesoderm-  
580 inducing signals override dorsal signals in vivo. *Cell*, 79(1), pp.169–179.
- 581 Grammer, T.C. et al., 2000. Use of large-scale expression cloning screens in the *Xenopus laevis*  
582 tadpole to identify gene function. *Developmental biology*, 228(2), pp.197–210.
- 583 Han, T. et al., 2013. How does cancer cell metabolism affect tumor migration and invasion? *Cell*  
584 *adhesion & migration*, 7(5), pp.395–403.
- 585 Heasman, J., Kofron, M. & Wylie, C., 2000. Beta-catenin signaling activity dissected in the early  
586 *Xenopus* embryo: a novel antisense approach. *Developmental biology*, 222(1), pp.124–134.
- 587 Heike, C.L., Luquetti, D. V & Hing, A. V, 1993. Craniofacial Microsomia Overview. In R. A. Pagon et  
588 al., eds. Seattle (WA).
- 589 Hirschhaeuser, F., Sattler, U.G.A. & Mueller-Klieser, W., 2011. Lactate: a metabolic key player in  
590 cancer. *Cancer research*, 71(22), pp.6921–6925.
- 591 Hopwood, N.D., Pluck, A. & Gurdon, J.B., 1989a. A *Xenopus* mRNA related to *Drosophila* twist is  
592 expressed in response to induction in the mesoderm and the neural crest. *Cell*, 59(5), pp.893–  
593 903.
- 594 Hopwood, N.D., Pluck, A. & Gurdon, J.B., 1989b. MyoD expression in the forming somites is an early  
595 response to mesoderm induction in *Xenopus* embryos. *The EMBO journal*, 8(11), pp.3409–3417.
- 596 Hu, N. et al., 2012. DNA methyltransferase3A as a molecular switch mediating the neural tube-to-  
597 neural crest fate transition. *Genes & development*, 26(21), pp.2380–5.
- 598 Ito, K. & Suda, T., 2014. Metabolic requirements for the maintenance of self-renewing stem cells.  
599 *Nature reviews. Molecular cell biology*, 15(4), pp.243–256.
- 600 Khadka, D., Luo, T. & Sargent, T.D., 2006. Msx1 and Msx2 have shared essential functions in neural  
601 crest but may be dispensable in epidermis and axis formation in *Xenopus*. *The International journal*  
602 *of developmental biology*, 50(5), pp.499–502.
- 603 LaBonne, C. & Bronner-Fraser, M., 1998. Neural crest induction in *Xenopus*: evidence for a two-  
604 signal model. *Development*, 125(13), pp.2403–14.
- 605 Lamb, T.M. et al., 1993. Neural induction by the secreted polypeptide noggin. *Science*, 262(5134),  
606 pp.713–718.
- 607 Lander, R. et al., 2013. Interactions between Twist and other core epithelial-mesenchymal transition  
608 factors are controlled by GSK3-mediated phosphorylation. *Nature communications*, 4 : 1542.
- 609 Leever, S.J., Vanhaesebroeck, B. & Waterfield, M.D., 1999. Signalling through phosphoinositide 3-  
610 kinases: the lipids take centre stage. *Current opinion in cell biology*, 11(2), pp.219–225.

- 611 Li, B. et al., 2009. The posteriorizing gene Gbx2 is a direct target of Wnt signalling and the earliest  
612 factor in neural crest induction. *Development*, 136(19), pp.3267–78.
- 613 Lincet, H. & Icard, P., 2015. How do glycolytic enzymes favour cancer cell proliferation by  
614 nonmetabolic functions? *Oncogene*, 34(29), pp.3751–3759.
- 615 Luo, T. et al., 2003. Induction of neural crest in *Xenopus* by transcription factor AP2alpha.  
616 *Proceedings of the National Academy of Sciences of the United States of America*, 100(2),  
617 pp.532–537.
- 618 Lwigale, P.Y., 2015. Corneal Development: Different Cells from a Common Progenitor. *Progress in*  
619 *molecular biology and translational science*, 134, pp.43–59.
- 620 Maczkowiak, F. et al., 2010. The Pax3 and Pax7 paralogs cooperate in neural and neural crest  
621 patterning using distinct molecular mechanisms, in *Xenopus laevis* embryos. *Developmental*  
622 *biology*, 340(2), pp.381–96.
- 623 Manning, B.D. & Cantley, L.C., 2007. AKT/PKB signaling: navigating downstream. *Cell*, 129(7),  
624 pp.1261–1274.
- 625 Mayor, R., Morgan, R. & Sargent, M.G., 1995. Induction of the prospective neural crest of *Xenopus*.  
626 *Development*, 121(3), pp.767–777.
- 627 Meulemans, D. & Bronner-Fraser, M., 2004. Gene-regulatory interactions in neural crest evolution  
628 and development. *Developmental Cell*, 7(3), pp.291–299.
- 629 Milet, C. et al., 2013. Pax3 and Zic1 drive induction and differentiation of multipotent, migratory, and  
630 functional neural crest in *Xenopus* embryos. *Proceedings of the National Academy of Sciences of*  
631 *the United States of America*, 110(14), pp.5528–33.
- 632 Milet, C. & Monsoro-Burq, A.H., 2014. Dissection of *Xenopus laevis* neural crest for in vitro explant  
633 culture or in vivo transplantation. *Journal of visualized experiments : JoVE*, (85), p.e51118.  
634 Available at: [http://www.jove.com/video/51118/dissection-xenopus-laevis-neural-crest-for-vitro-](http://www.jove.com/video/51118/dissection-xenopus-laevis-neural-crest-for-vitro-explant-culture-or)  
635 [explant-culture-or](http://www.jove.com/video/51118/dissection-xenopus-laevis-neural-crest-for-vitro-explant-culture-or) .
- 636 Milet, C. & Monsoro-Burq, A.H., 2012. Neural crest induction at the neural plate border in vertebrates.  
637 *Developmental biology*, 366(1), pp.22–33.
- 638 Mizuseki, K. et al., 1998. *Xenopus* Zic-related-1 and Sox-2, two factors induced by chordin, have  
639 distinct activities in the initiation of neural induction. *Development*, 125(4), pp.579–587.
- 640 Monsoro-Burq, A.-H., Fletcher, R.B. & Harland, R., 2003. Neural crest induction by paraxial  
641 mesoderm in *Xenopus* embryos requires FGF signals. *Development*, 130(14), pp.3111–3124.
- 642 Monsoro-Burq, A.-H., Wang, E. & Harland, R., 2005. Msx1 and Pax3 cooperate to mediate FGF8 and  
643 WNT signals during *Xenopus* neural crest induction. *Developmental cell*, 8(2), pp.167–78.

- 644 Monsoro-Burq, A.H., 2007. A rapid protocol for whole-mount in situ hybridization on *Xenopus*  
645 embryos. *CSH protocols*, 2007, p.pdb.prot4809.
- 646 Neave, B., Holder, N. & Patient, R., 1997. A graded response to BMP-4 spatially coordinates  
647 patterning of the mesoderm and ectoderm in the zebrafish. *Mechanisms of development*, 62(2),  
648 pp.183–195.
- 649 Nichane, M. et al., 2008. Hairy2-Id3 interactions play an essential role in *Xenopus* neural crest  
650 progenitor specification. *Developmental biology*, 322(2), pp.355–67.
- 651 Nieto, M.A. et al., 1994. Control of cell behavior during vertebrate development by Slug, a zinc finger  
652 gene. *Science*, 264(5160), pp.835–839.
- 653 Nieuwkoop, P.D. & Faber, J., 1994. *Normal Table of Xenopus Laevis (Daudin): A Systematical and*  
654 *Chronological Survey of the Development from the Fertilized Egg Till the End of Metamorphosis*,  
655 Garland Pub.
- 656 Okar, D. a et al., 2001. PFK-2/FBPase-2: maker and breaker of the essential biofactor fructose-2, 6-  
657 bisphosphate. *Trends in biochemical sciences*, 26(1).
- 658 Pegoraro, C. et al., 2015. PFKFB4 controls embryonic patterning via Akt signalling independently of  
659 glycolysis. , *Nat Commun.* 6:5953. doi: 10.1038/ncomms6953  
660
- 661 Pegoraro, C., MacZkowiak, F. & Monsoro-Burq, A.H., 2013. Pfkfb (6-phosphofructo-2-kinase/fructose-  
662 2,6-bisphosphatase) isoforms display a tissue-specific and dynamic expression during *Xenopus*  
663 *laevis* development. *Gene Expression Patterns*, 13(7), pp.203–211.
- 664 Pegoraro, C. & Monsoro-Burq, A.H., 2012. Signaling and transcriptional regulation in neural crest  
665 specification and migration: lessons from *xenopus* embryos. *Developmental biology*, 2(2), pp.247–  
666 59.
- 667 Peng, Y. et al., 2004. Phosphatidylinositol 3-kinase signaling is involved in neurogenesis during  
668 *Xenopus* embryonic development. *The Journal of biological chemistry*, 279(27), pp.28509–14.
- 669 Peyssonnaud, C. et al., 2000. Induction of postmitotic neuroretina cell proliferation by distinct Ras  
670 downstream signaling pathways. *Molecular and cellular biology*, 20(19), pp.7068–7079.
- 671 Pilkis, S.J., Claus, T.H. & Kurland, I., 1995. 6-Phosphofructo-2-kinase/Fructose-2,6-bisphosphatase:  
672 a metabolic signaling enzyme. *Annual Review of Biochemistry*, 64, pp.799–835.
- 673 Plouhinec, J.-L. et al., 2014. Pax3 and Zic1 trigger the early neural crest gene regulatory network by  
674 the direct activation of multiple key neural crest specifiers. *Developmental biology*, 386(2), pp.461–  
675 72.

- 676 Qu, J. et al., 2016. PFKFB3 modulates glycolytic metabolism and alleviates endoplasmic reticulum  
677 stress in human osteoarthritis cartilage. *Clinical and experimental pharmacology & physiology*,  
678 43(3), pp.312–318.
- 679 Saint-Jeannet, J.P. et al., 1989. Expression of N-CAM precedes neural induction in *Pleurodeles waltl*  
680 (urodele, amphibian). *Development*, 106(4), pp.675–683.
- 681 Saint-Jeannet, J.P. et al., 1997. Regulation of dorsal fate in the neuraxis by Wnt-1 and Wnt-3a.  
682 *Proceedings of the National Academy of Sciences of the United States of America*, 94(25),  
683 pp.13713–13718.
- 684 Sato, T., Sasai, N. & Sasai, Y., 2005. Neural crest determination by co-activation of Pax3 and Zic1  
685 genes in *Xenopus* ectoderm. *Development*, 132(10), pp.2355–63.
- 686 Scheel, C. & Weinberg, R.A., 2012. Cancer stem cells and epithelial-mesenchymal transition:  
687 concepts and molecular links. *Seminars in cancer biology*, 22(5-6), pp.396–403.
- 688 Sharpe, P.T. et al., 1988. Isolation and expression of a new mouse homeobox gene. *Development*,  
689 102(2), pp.397–407.
- 690 Simões-Costa, M. et al., 2014. Transcriptome analysis reveals novel players in the cranial neural  
691 crest gene regulatory network. *Genome research*, 24(2), pp.281–90.
- 692 Simões-Costa, M., Stone, M. & Bronner, M.E., 2015. Axud1 Integrates Wnt Signaling and  
693 Transcriptional Inputs to Drive Neural Crest Formation. *Developmental cell*, 34(5), pp.544–554.
- 694 Sive, H.L., Grainger, R.M. & Harland, R.M., 2010. *Early Development of Xenopus Laevis: A*  
695 *Laboratory Manual*, Cold Spring Harbor Laboratory Press. Available at:  
696 <https://books.google.pt/books?id=ULDpRAAACAAJ>.
- 697 Spokony, R.F. et al., 2002. The transcription factor Sox9 is required for cranial neural crest  
698 development in *Xenopus*. *Development*, 129(2), pp.421–432.
- 699 Steventon, B. et al., 2009. Differential requirements of BMP and Wnt signalling during gastrulation  
700 and neurulation define two steps in neural crest induction. *Development*, 136(5), pp.771–9.
- 701 Strobl-Mazzulla, P.H., Sauka-Spengler, T. & Bronner-Fraser, M., 2010. Histone demethylase Jmjd2A  
702 regulates neural crest specification. *Developmental cell*, 19(3), pp.460–8.
- 703 Théveneau, E., Duband, J.L. & Altabef, M., 2007. Ets-1 confers cranial features on neural crest  
704 delamination. *PLoS ONE*, 2(11).
- 705 Theveneau, E. & Mayor, R., 2012. Neural crest delamination and migration: from epithelium-to-  
706 mesenchyme transition to collective cell migration. *Developmental biology*, 366(1), pp.34–54.
- 707 Trefely, S. et al., 2015. Kinome Screen Identifies PFKFB3 and Glucose Metabolism as Important  
708 Regulators of the Insulin/Insulin-like Growth Factor (IGF)-1 Signaling Pathway. *The Journal of*  
709 *biological chemistry*, 290(43), pp.25834–25846.

- 710 Tsien, R.Y., 1998. The green fluorescent protein. *Annual review of biochemistry*, 67, pp.509–544.
- 711 Valluet, A. et al., 2012. B-Raf and C-Raf are required for melanocyte stem cell self-maintenance. *Cell*  
712 *reports*, 2(4), pp.774–80.
- 713 Vega, S. et al., 2004. Snail blocks the cell cycle and confers resistance to cell death. *Genes and*  
714 *Development*, 18, pp. 1131-1143
- 715 Villanueva, S. et al., 2002. Posteriorization by FGF, Wnt, and retinoic acid is required for neural crest  
716 induction. *Developmental biology*, 241(2), pp.289–301.
- 717 Wilson, N.R. et al., 2016. SPECC1L deficiency results in increased adherens junction stability and  
718 reduced cranial neural crest cell delamination. *Scientific reports*, 6, p.17735.
- 719 Wilson, P.A. et al., 1997. Concentration-dependent patterning of the *Xenopus* ectoderm by BMP4 and  
720 its signal transducer Smad1. *Development*, 124(16), pp.3177–3184.
- 721 Yalcin, A. et al., 2009. Nuclear targeting of 6-phosphofructo-2-kinase (PFKFB3) increases  
722 proliferation via cyclin-dependent kinases. *Journal of Biological Chemistry*, 284(36), pp.24223–  
723 24232.
- 724 Yang, W. et al., 2011. Nuclear PKM2 regulates  $\beta$ -catenin transactivation upon EGFR activation.  
725 *Nature*, 478(7375), pp.118–122.
- 726 Yang, W. et al., 2012. PKM2 phosphorylates histone H3 and promotes gene transcription and  
727 tumorigenesis. *Cell*, 150(4), pp.685–696.

728

## 729 **FIGURE LEGENDS**

730

### 731 **Fig. 1. PFKFB4 promotes neural border and neural crest formation.**

732 (A) NC is induced during neural plate stage (st.12.5 to st.14). NB specifiers expression (red) is  
733 robustly established lateral to the neural plate, early NC specifiers expression (*snail2*, *foxd3*) is faintly  
734 initiated (light pink). (B-C) During neural fold elevation (st.14 to st.17), future NC cells progressively  
735 acquire their definitive specification and specific cellular properties (survival, expression of late NC  
736 specifiers, cadherin switch...) ensuring their ability to undergo EMT and migration at the end of  
737 neurulation (C, st.18 to st.19). (D-F,H,I) *Pfkfb4* is enriched in the NB/NC in neurulas and tadpoles. (J)  
738 *Pfkfb3* is expressed in the neural tube. Sense probes (*pfkfb4*, G; *pfkfb3*, K). Neurula stages: late  
739 gastrula/early neural plate stage: st.12 (D), end of neural plate stage, st.14 (E), neural fold stage;  
740 st.16 (F), neural tube closure/ end of neurulation: st.19 (H). Tailbud stage: st.22 (I). E-H, J,K: dorsal  
741 views, anterior to the right. D,I: side views. Scale bar, 1mm. (L-N) Cross-sections through the mid-  
742 neurula anterior neural plate (st.14) show *snail2* and *pfkfb4* expression in NB/NC. (L) The notochord,  
743 neural plate and paraxial mesoderm are outlined on hematoxylin-eosin stained sections. (M-N)



744 Vibratome sections. Arrow indicates the midline. Arrowheads indicate the st.14 NB (red bar). Scale  
745 bar, 200 $\mu$ m. (O-S) *pfkfb4* gain-of-function expanded the st.14 NB (O,P, 59% of embryos with enlarged  
746 NB compared to the contralateral uninjected side, n=81) and premigratory NC (Q, st.14, 59%  
747 enlarged *Snail2* expression, n=147), (R,S: st.18, 55% increase, n=271). Migrating NC streams were  
748 expanded (T,Z, st. 22-24, 65% expansion, n=49). In contrast, pan- or regional neural plate markers  
749 (*sox2*, *otx2*, *hoxb9*), ectoderm (*keratin K81*, *ep.Ker.*) or paraxial mesoderm (*myod*) markers were  
750 unaffected (U-Y). O-S, U-X: dorsal views. T,Z: side views, Y: dorsal-posterior view. Scale bar=500 $\mu$ m.  
751 Detailed phenotype scoring in Table.S2.

752

753 **Fig. 2. Moderate PFKFB4 depletion results in severe craniofacial defects in tadpoles.**

754 (A) *Pfkfb4* mRNA levels were quantified on neurulas dorsal tissues (RTqPCR). Injections at "high  
755 concentration" (10ng/cell in 4-cell-stage embryos) reduced *pfkfb4* levels by 52% and caused  
756 developmental arrest. "Milder" concentration (5ng/cell in 4-cell-stage embryos) decreased *pfkfb4*  
757 mRNA by 32% (low-level depletion), and allowed swimming tadpoles development. (B-E) Craniofacial  
758 morphology in tadpoles st.45-46. Low-level PFKFB4MO depletion reduced craniofacial structures on  
759 the injected side (n=17). The branchial arch cartilages area was severely diminished on the injected  
760 side (36% reduction compared to the contralateral side, n=8; p-value<0.0001 compared to side-to-  
761 side variations in a control population, n=9). Lower doses did not significantly reduce cartilage area  
762 (n= 6), or affect head morphology (n=20). (C) Head morphology, dorsal view, arrowhead: injected  
763 side. (D) Dissected jaw and branchial arches cartilages, ventral view, arrowheads: injected side. (E)  
764 Scheme of D. Scale bar,500  $\mu$ m.

765

766 **Fig. 3. PFKFB4 low-level depletion delays NC early specification, causes retention of NB**  
767 **character, impairs NC late specification and migration.**

768 (A) At st.14, *snail2* expression was severely reduced, or abolished, on the injected side (reduced in  
769 78% of embryos, n=42). (B) At st.18, sibling embryos had recovered *snail2* expression (normal in  
770 73% of embryos, n=66). (C-D) While *sox10* expression was mainly unaffected (65%, n=31), *twist* was  
771 severely impaired (65%, n=49). (E-H) In contrast, expression of the immature NC marker *hes4* was  
772 expanded (73%, n=37), as were some NB markers, either strongly (*pax3*, 100%, n=39) or moderately  
773 (*zic1*, 46% n=13). Other NB markers were unperturbed (*msx1*, normal in 80% of embryos, n=10). (I-K)  
774 Neural plate (*sox2*, n=13), non-neural ectoderm (*ep.ker.*, n=12) and paraxial mesoderm (*myod*, n=4)  
775 seemed unaffected. (L) Percent of embryos with each phenotype, details in Table.S2. A-K: dorsal  
776 views. (M-R) St.24 tailbud embryos exhibited a severe NC migration defect (M-Q, *sox10*, 50%, n=10;

777 *twist* 56%, n=25). *Sox2* expression appeared grossly unaffected, despite marginal reduction of optic  
778 vesicle size (R, n=5). (S) Co-injection of *pfkfb4* mRNA with PFKFBMO rescued both *sox10/twist*  
779 alterations of expression and NC migration defects in a significant proportion of the embryos,  
780 compared to PFKFB4MO injections: *sox10* and *twist* expression were restored or increased a majority  
781 of the embryos (n=29 and n=18 respectively). The injected side (inj) is compared to the control side  
782 (co) in side views (M,N,P,Q, anterior to the right) or frontal views (O, R, red arrow on injected side).  
783 Scale bar, 500  $\mu$ m.

784

785 **Fig. 4. Inducible depletion demonstrates independent PFKFB4 roles in NC specification and**  
786 **migration.** We co-injected a UV-cleavable sense MO (PhMO) to block PFKFB4MO until the desired  
787 developmental stage and monitored *twist* expression at st18. (A-H) Strategy of phMO validation: *lacZ*  
788 control injections (A), unmasked PFKFB4MO, "high" dose (B), PhMO/MO without UV illumination (C,  
789 uninduced, u.i); UV illumination at early NC specification st12.5 (D-G). (A) *LacZ* injections did not alter  
790 *twist* pattern (100%, n=31). PFKFB4MO severely blocked *twist* expression (abolished (80%) or  
791 diminished (17%) n=35). *Twist* decreased in PhMO/MO-injected embryos UV-illuminated immediately  
792 after injection (a.i.) (H, 73%, n=15). *Pfkfb4* depletion, activated at st12.5, decreased *twist* expression  
793 strongly (47%), or moderately (22.6%) (n=53). This effect persisted until EMT and early NC  
794 emigration (G, stage 20). (A-G): dorsal views. (I-W) To deplete *pfkfb4* during EMT/early migration, st.  
795 18 neurulas were UV illuminated and analyzed at tadpole st 24. *Twist* was normal in embryos injected  
796 with *lacZ* (I,J; n=41), or with PhMO/MO but not illuminated (M,N; n=38). Cells injected with  
797 PFKFB4MO alone died as expected (K,L; n=52). PhMO/MO-injected embryos UV-illuminated at st. 18  
798 exhibited three phenotypes classes (n=42): "migration" (O,P), "staining and migration" (Q,R) and  
799 "severe staining" defects (S,T). We compared percent of each phenotype (U), percent of migration  
800 distance (V), percent of NC stream area (W, *twist*-expressing area) to the contralateral side. Scale  
801 bars = 500  $\mu$ m. All phenotype differences were statistically significant between illuminated PhMO/MO-  
802 injected embryos, and either *lacZ*-injected, or uninduced PhMO/MO-injected embryos (\*: p-  
803 value<0.05; \*\*: p-value<0.01; \*\*\*: p-value<0.001; ns: non significant).

804

805 **Fig. 5: AKT signaling mediates PFKFB4 function on premigratory NC maturation.**

806 (A) In embryos, PFKFB4 can regulate AKT signaling in addition to glycolysis rate. Here, in morphants,  
807 dissected st. 14 NB or st. 17 NC displayed decreased activated AKT signaling levels. (B) AKT  
808 regulates many aspects of cell homeostasis including cell proliferation, cell survival, and cell  
809 metabolism. Here, embryos injected with *gfp* and MO in NC area were selected and sectioned: cell  
810 counting after EdU incorporation showed that cell proliferation rate was normal after PFKFB4MO

811 injections. (C, D) PFKFB4MO affected late NC specifier *twist* expression, while NC stem cells marker  
812 *cmyc* was normally activated. (E-H) Pharmacological treatment during neural fold stage (st. 14 to st.  
813 18) showed that blocking MAPK signaling (E, G) did not affect NC development, while blocking PI3K-  
814 AKT signaling (F, H) affected *twist* but not *cmyc*, thus phenocopying PFKFB4MO effect. (I, J)  
815 Coinjection of PFKFB4MO with a constitutively AKT (blue arrows) rescued the morphant *twist*  
816 phenotype (red arrows): two sibling embryos for each injection are shown. St. 18 *pfkfb4* morphants  
817 presented diminished *twist* (69%, n=26). (B) In contrast, siblings co-injected with PFKFB4MO and  
818 *caAkt* mRNA had normal *twist* expression in the majority of cases (73% normal or enlarged, n=42).  
819 Scale bars = 500  $\mu$ m.

820

821 **Fig. 6. PFKFB4 morphant neural crest progenitors fail to undergo EMT and migration.**

822 (A, B) When transplanted into a wild-type host embryo, GFP-labeled wild-type NC efficiently migrates  
823 and populates the host branchial arches, whichever the size of the grafted tissue (A) large graft, (B)  
824 small graft (20/24 cases, n=24). (C, D) In contrast, PFKFB4 morphant NC exhibited defective healing,  
825 resulting in small-size grafts, which yielded few, if any, migratory NCC into the host craniofacial area  
826 (n=23, occasional migration in 9/23 grafted embryos). (C) Small graft without migratory cells and (D)  
827 small graft with few cells reaching the branchial arches, *gfp* staining by WISH to enhance individual  
828 cell visualisation. (E) *N-cadherin* expression (RTqPCR on dissected explants), either prior to EMT  
829 (NB, st. 14), or in premigratory NC (st. 17). (F-J) Wild-type or morphant cells were lineage traced *in*  
830 *vivo*, on embryos injected in the prospective neural fold unilaterally (F, H). (G-J) At tailbud stage,  
831 control cells (G) efficiently populated branchial arches and were also found in brain and eye (J). In  
832 contrast, morphant cells failed to populate branchial arches (I) in a dose-dependent manner (J), but  
833 were normally found in the brain and eye (J). (K-R) NB were dissected prior to EMT (st. 14), plated  
834 onto fibronectin. Cell behavior was followed by time-lapse videomicroscopy. Wild-type NC (K-N)  
835 adheres efficiently, undergoes EMT (L), cell scattering and migration (M, N). Morphant NC (O-R)  
836 presented poor adherence, delayed (P) and inefficient EMT (Q), and few emigrating cells (R). Scale  
837 bar = 160  $\mu$ m.

838

839 **Fig. 7. Glycolysis and PI3K-AKT signaling impact NC migration similarly to PFKFB4 low-level**  
840 **depletion, and activating AKT signaling rescues PFKFB4 downregulation.**

841 (A-H) When glycolysis (2DG) or PI3K-AKT pathway (LY294002) were blocked during EMT and  
842 migration (st. 18 to st. 24) both treatments severely affected NC migration at st. 24 (*twist*, n=16 (2DG),  
843 n=14 (LY); *sox10* (n= 11 (2DG), n=12 (LY). (I-L) At st. 45, tadpoles treated during NC migration then  
844 grown in control medium, exhibited general head morphology defects, including eye defects and

845 reduced branchial cartilages. (I, K) sibling controls, n=30; (J) 2DG, n=13; (L) LY294002, n=19. (A-H)  
846 side views, (I-L) dorsal view. (M) At tadpole st. 45, morphant sides were severely affected (P, 83%  
847 embryos with craniofacial reduction, n=23), while activation of *Akt* signaling (N) did not affect overall  
848 craniofacial morphogenesis (P, 92% symmetrical, n=59). Tadpoles co-injected with PFKFB4MO and  
849 *caAkt* (O) were largely rescued, with 66% of embryos with injected side symmetrical to contralateral  
850 side (P, n=63). (M) Red bar: eye distance from the midline (morphant side). Blue bar: control  
851 distance. Both bars were aligned for comparison. (N) On both sides, the same blue bar measures eye  
852 distance from the midline. Scale bar = 500  $\mu$ m.

853

854 **Fig. 8. *Pfkfb4* activation during neural fold stage is regulated by the neural crest GRN.**

855 (A-Y) Unilateral depletion of members of the NC-GRN modulated *pfkfb4* activation at the NB (st.14)  
856 and NC (st.18). (A-H) Blockade of WNT and FGF signaling strongly decreased *snail2* and *pfkfb4*  
857 expression. (I-L). Conversely, BMP signaling downregulation upregulated *snail2* and *pfkfb4*  
858 expression, laterally to the NB. (M-T) Knockdown of the NC specifiers PAX3 and TFAP2a resulted in  
859 loss of *snail2* and *pfkfb4*. (U-Y) Knockdown of the NC specifier SOX9 depleted *snail2* and *pfkfb4*.  
860 Dorsal views, injected side on the right. Detailed scoring: see Table S2. Scale bar = 500 $\mu$ m.

861

862 **Fig. 9. Model of PFKFB4-controlled AKT signaling in NC maturation, EMT and migration.**

863 During neurulation, in control conditions (left side), NC induction is initiated at the neural plate stage  
864 with weak *snail2* expression. This initial induction is then strengthened during neural fold stage, under  
865 the action of the NC-GRN which, in particular, activates *pfkfb4* expression in NC progenitors. This  
866 second phase allows acquisition of cellular ability to undergo EMT and migration upon neural tube  
867 closure. When AKT signaling is defective (right side), either after PFKFB4 low-level depletion, or  
868 using pharmacological inhibitors, delays in NC specification cascade occur, incomplete maturation is  
869 observed, and NC fails to undergo EMT. When PFKFB4 and AKT functions are prevented after EMT,  
870 fewer NC cell migrate. As a result, reduced craniofacial skeletal elements form. This series of results  
871 shows that the steps of NC early development rely upon a continuous and elevated AKT signaling  
872 level, sustained by PFKFB4, itself triggered by the NC-GRN.

**Fig.1**

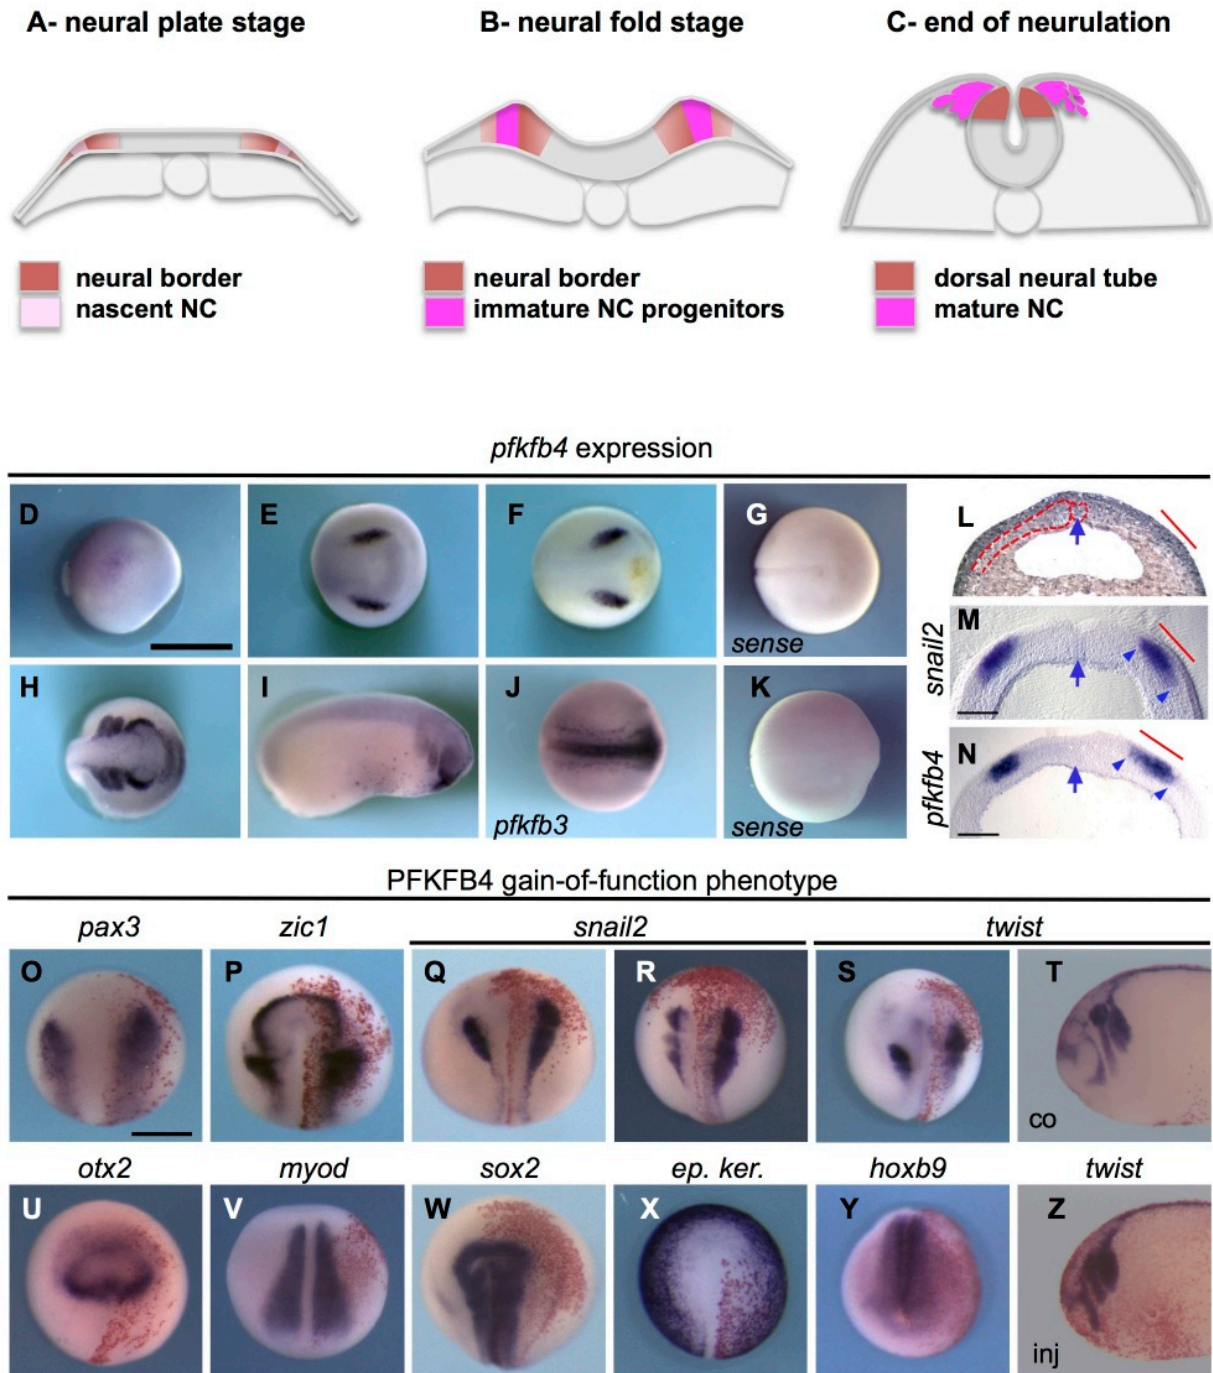

**Fig. 2**

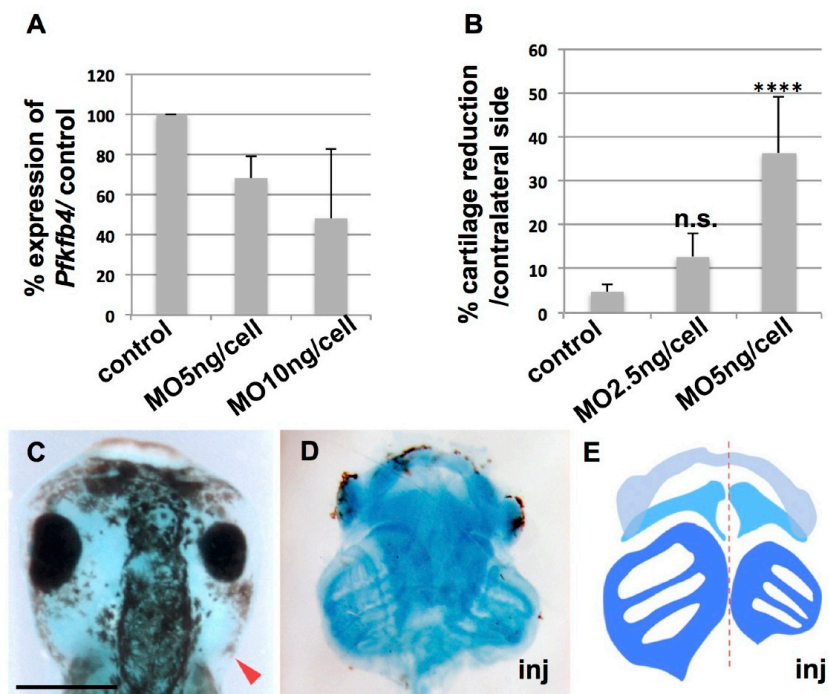

**Fig. 3**

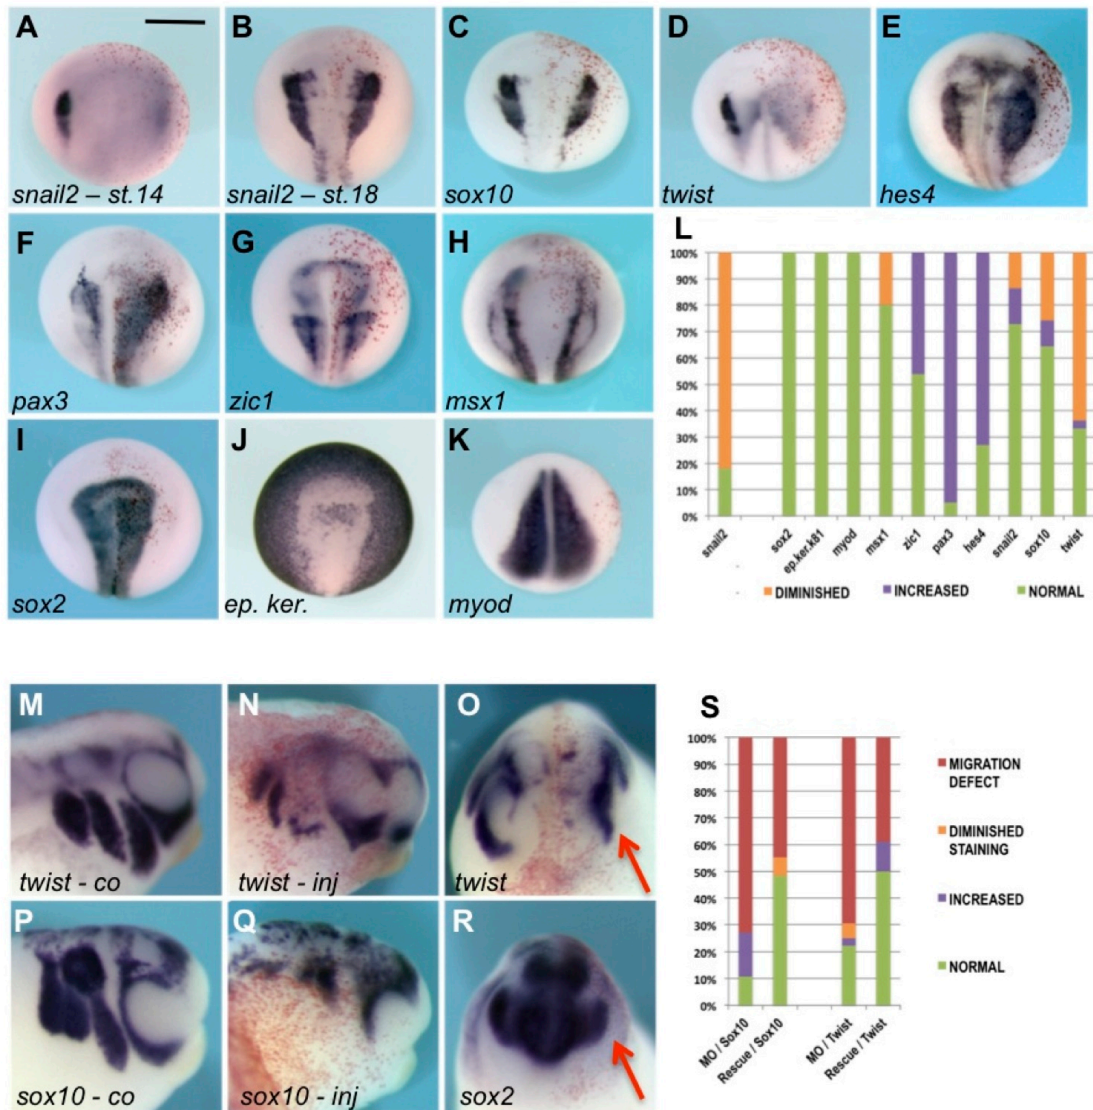

**Fig. 4**

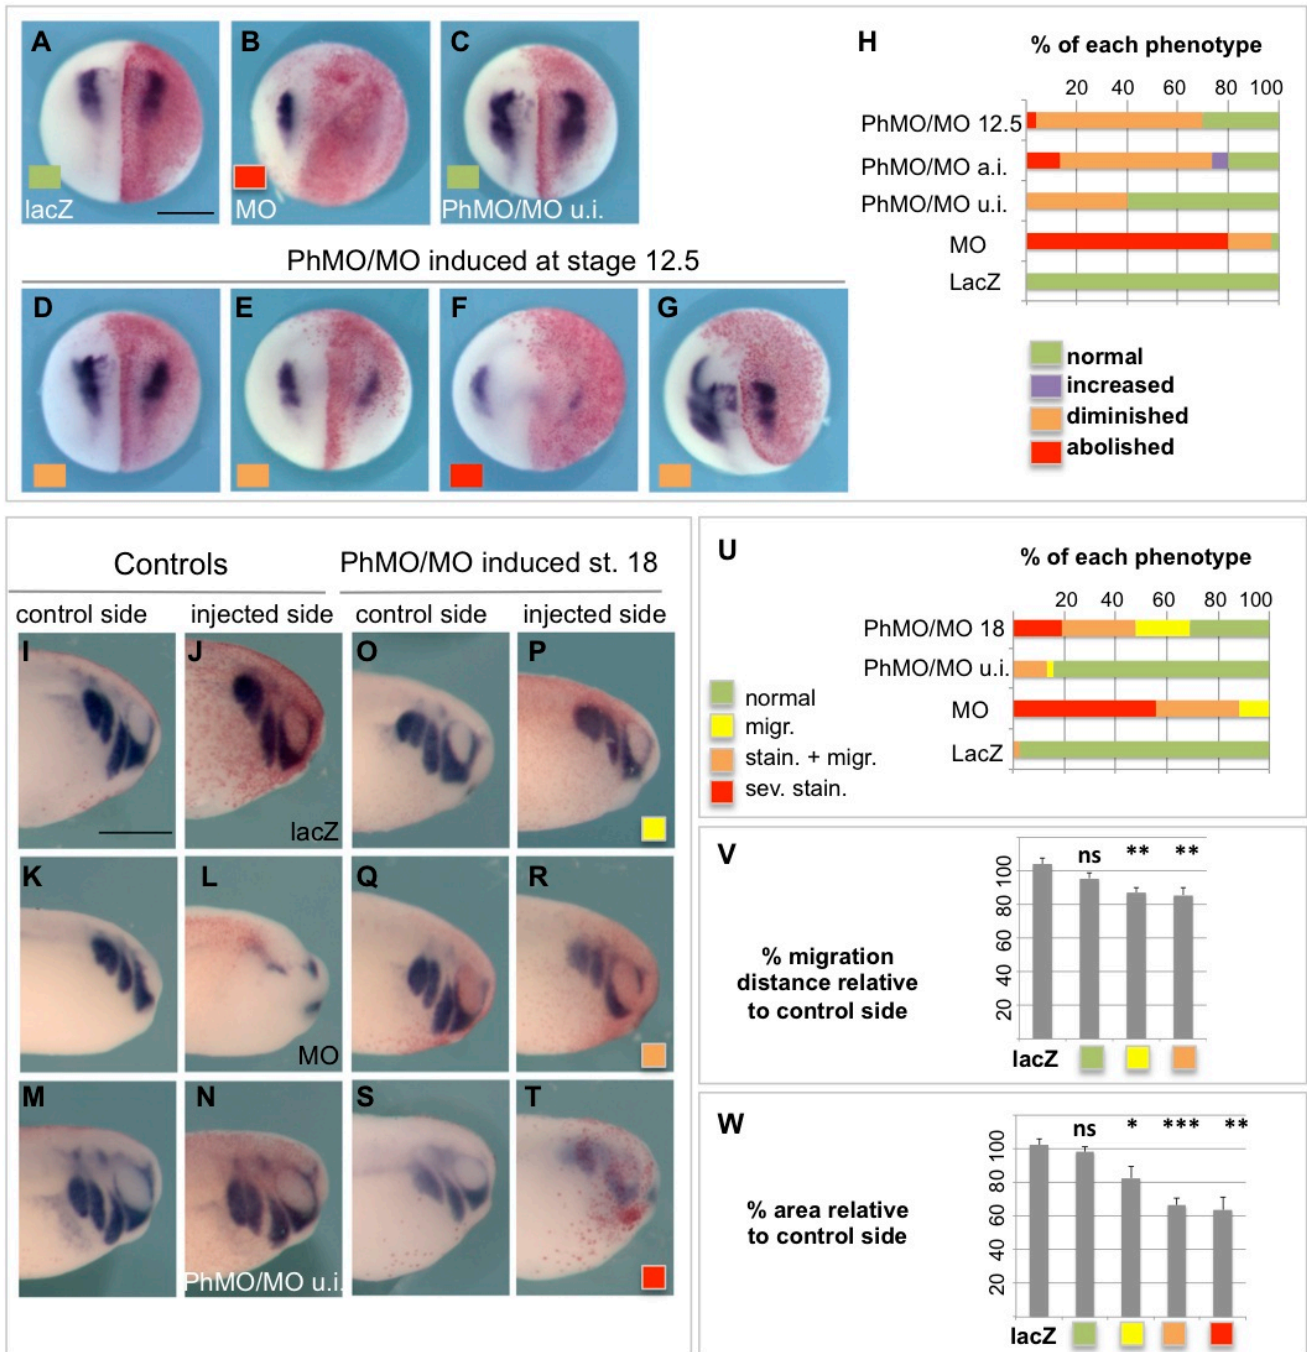



**Fig. 5**

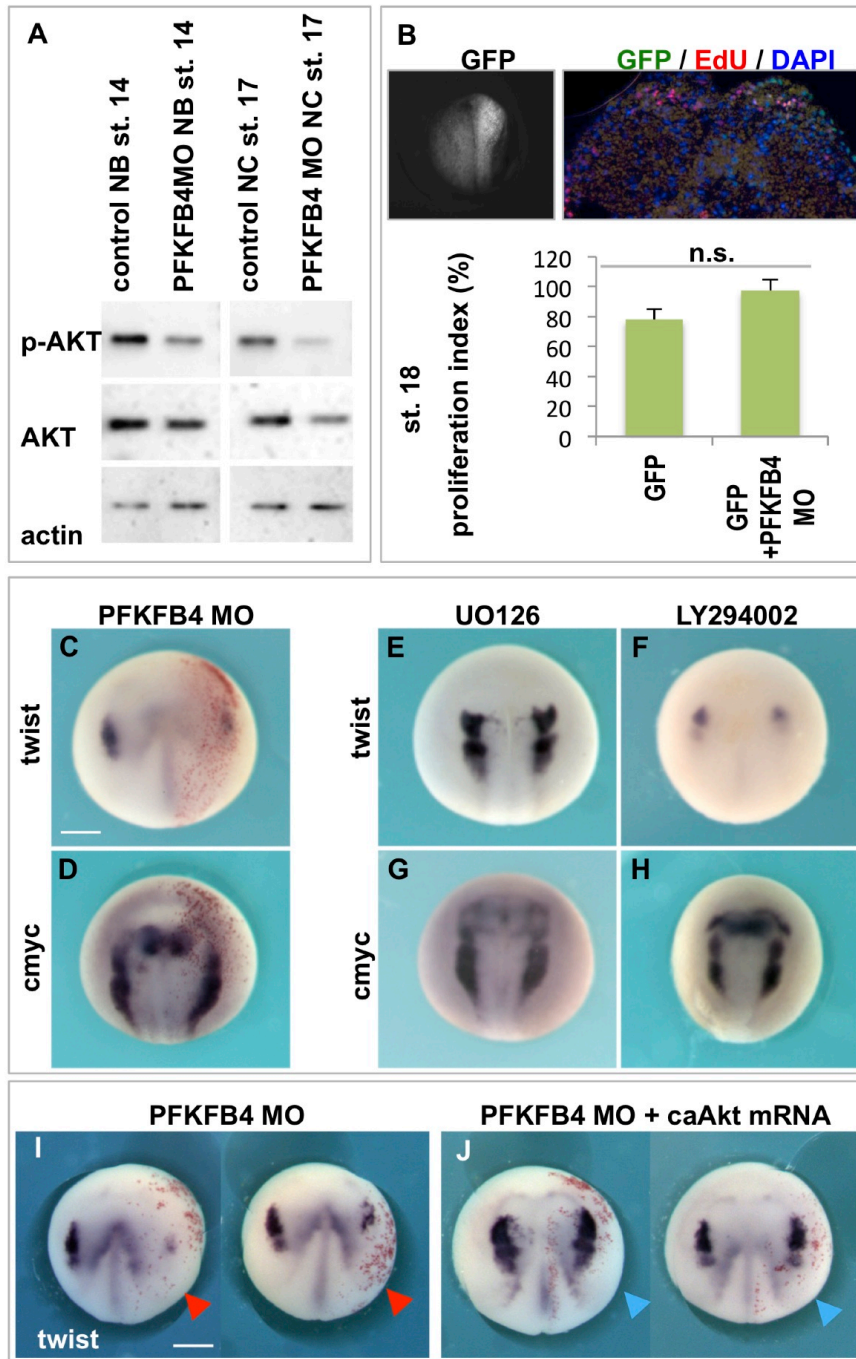

**Fig. 6**

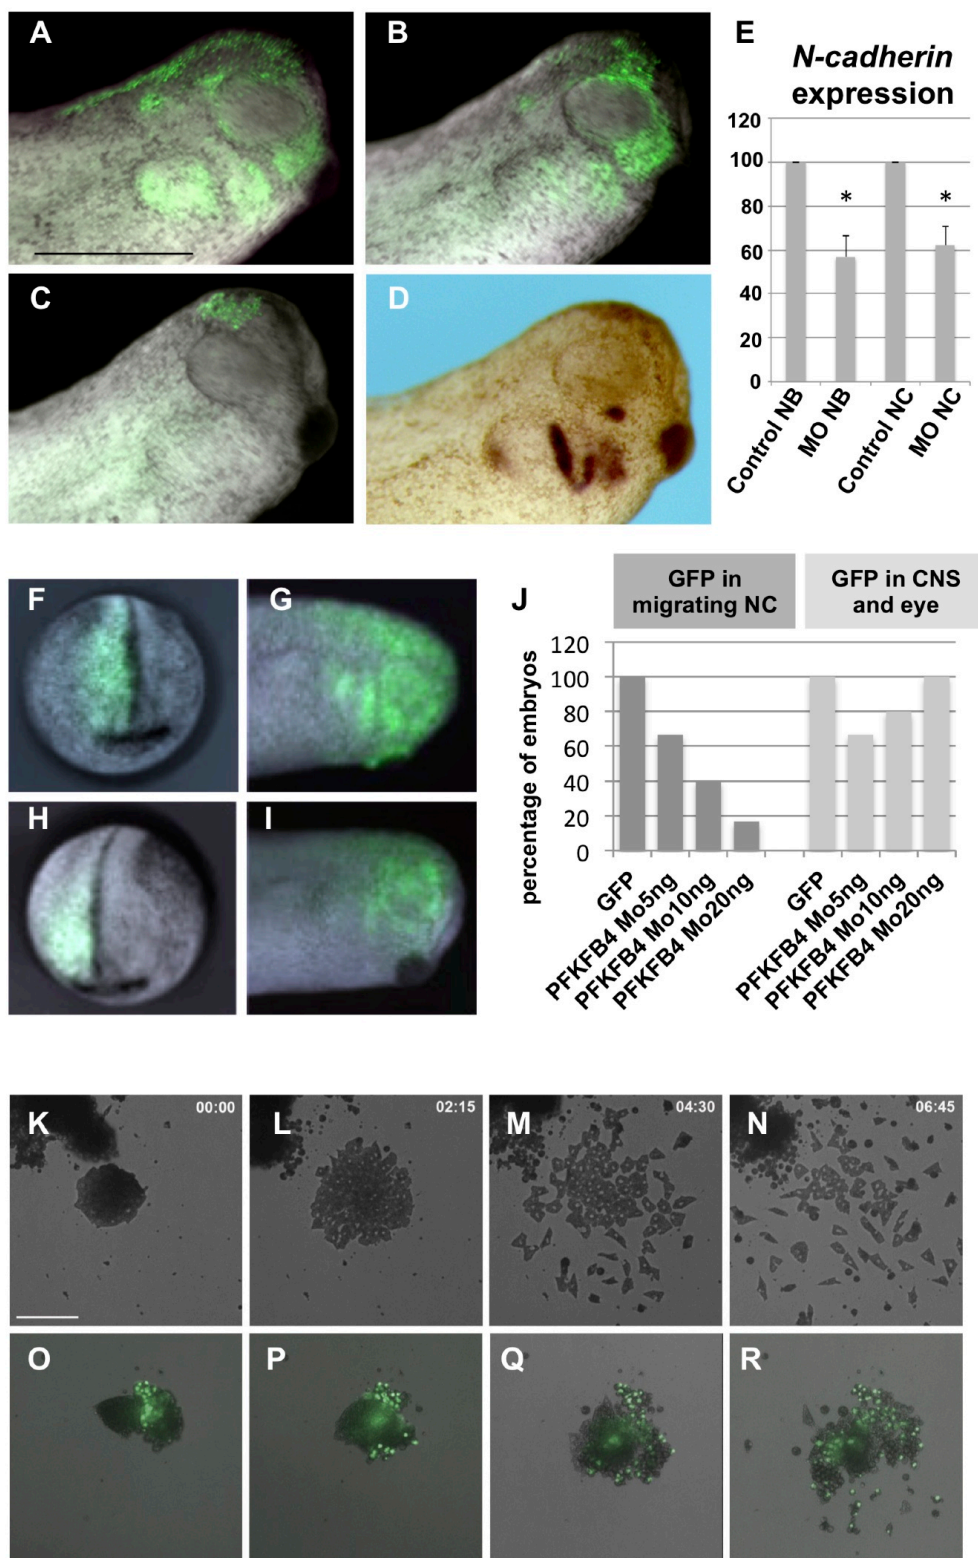

**Fig. 7**

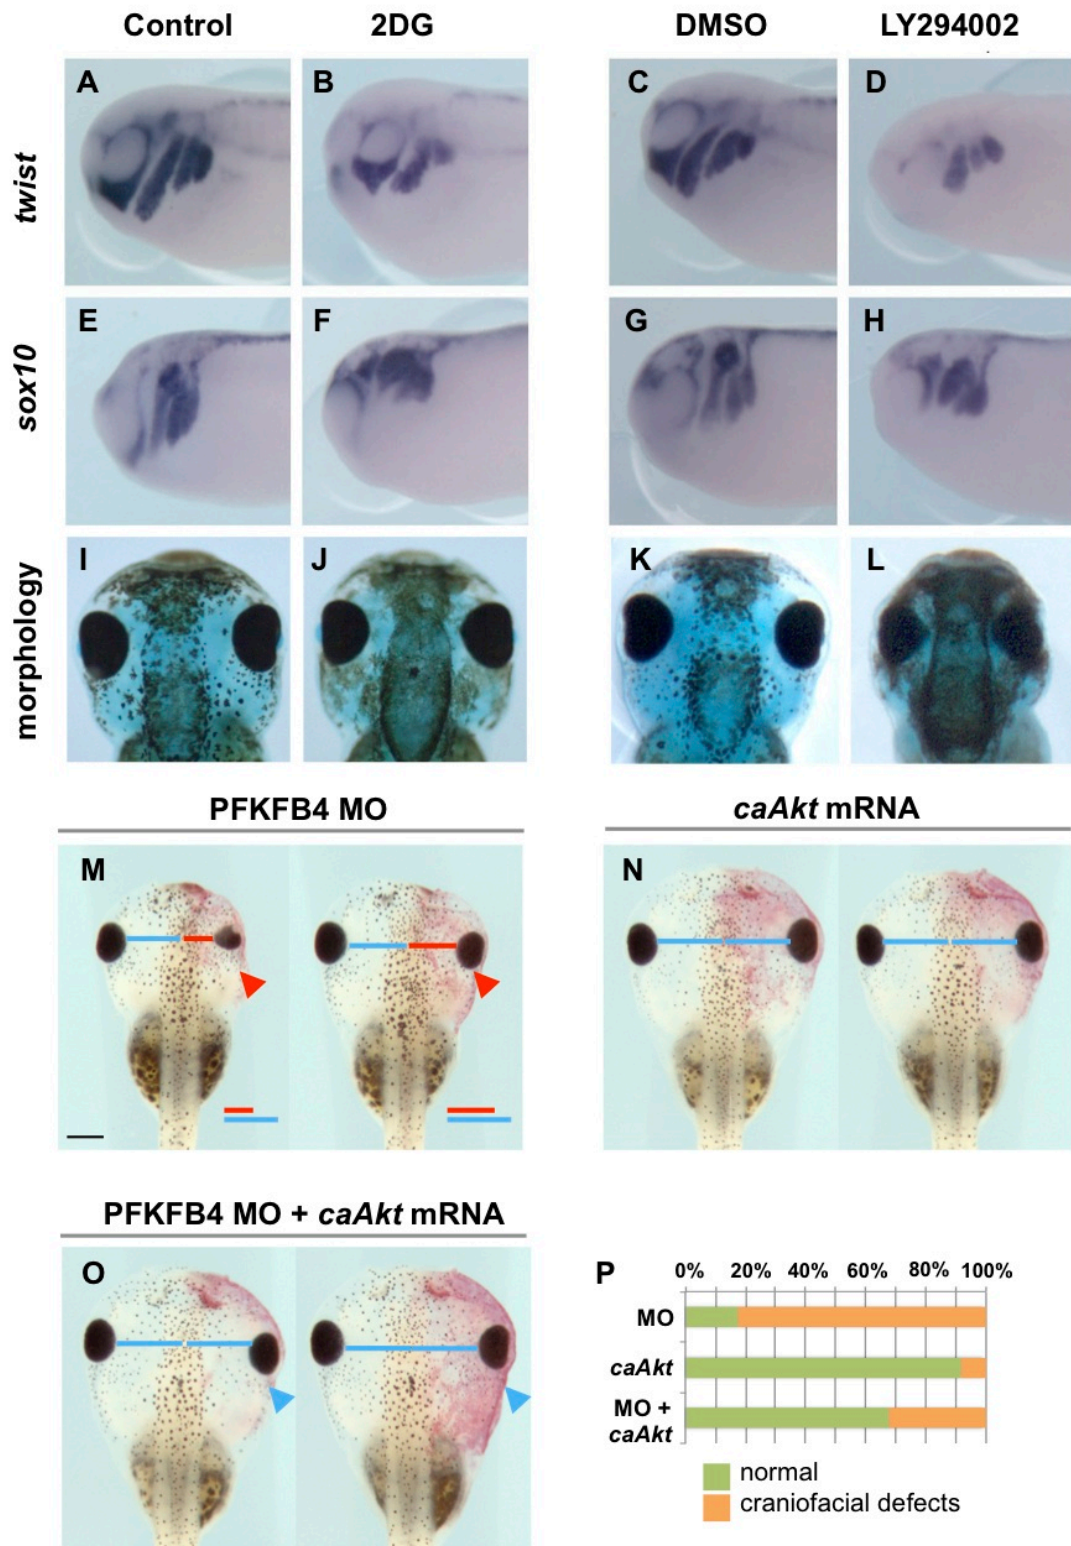

**Fig 8**

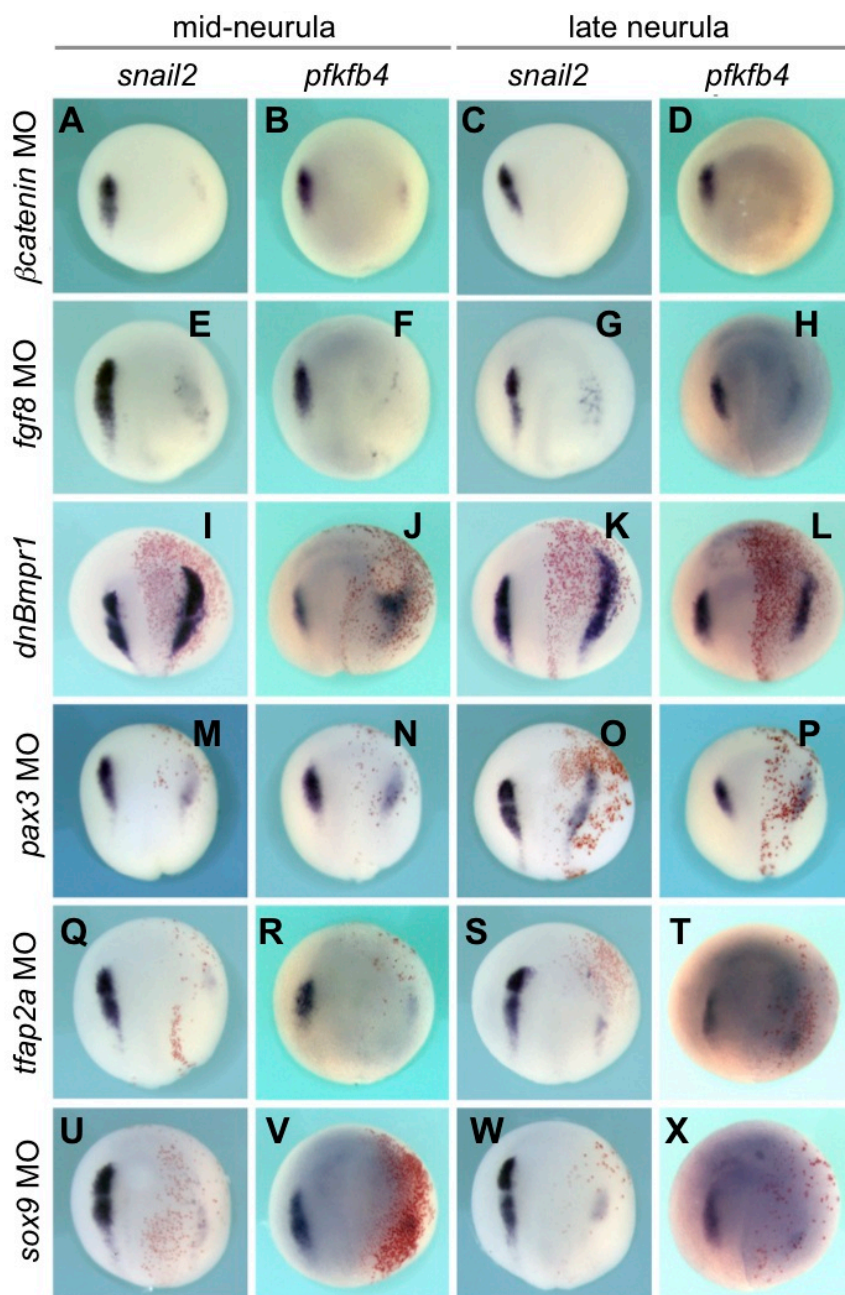

**Fig. 9**

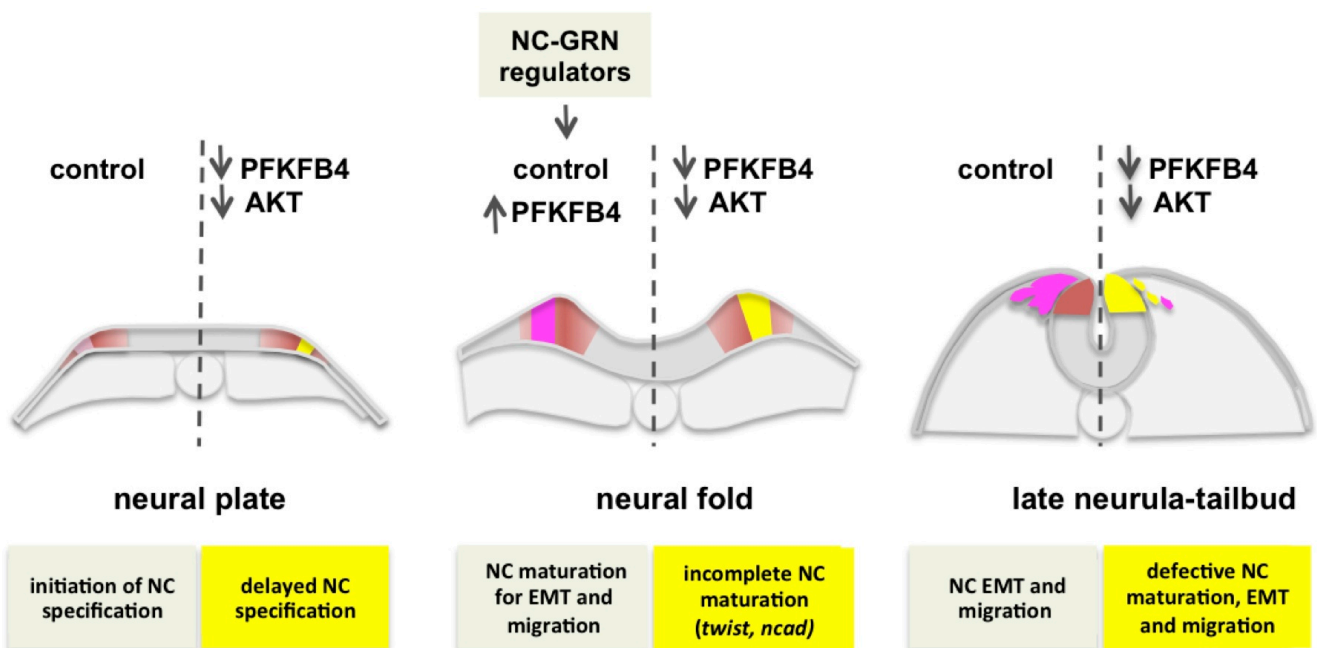

**Table S1**  
Reagents used in this study

Plasmids

| Plasmid                      | Reference                                    | usage             |
|------------------------------|----------------------------------------------|-------------------|
| <i>caBmpr1</i>               | Gift from R. Harland                         | mRNA              |
| <i>dnBmpr1</i>               | (Graff et al. 1994)                          | mRNA              |
| <i>caAkt</i>                 | (Peyssonnaud et al. 2000)                    | mRNA              |
| <i>cmyc</i>                  | (Bellmeyer et al. 2003)                      | WISH probes       |
| <i>Epidermal Keratin K81</i> | (Bradley et al. 1998)                        | WISH probes       |
| <i>Fgf8</i>                  | (Monsoro-Burq et al. 2003)                   | mRNA              |
| <i>Hes4</i>                  | (Nichane et al. 2008)                        | WISH probes       |
| <i>Histone2B-GFP</i>         | (Tsien 1998)                                 | mRNA              |
| <i>Hoxb9</i>                 | (Sharpe et al. 1988)                         | WISH probes       |
| <i>Myod</i>                  | (Hopwood et al. 1989b)                       | WISH probes       |
| <i>Msx1</i>                  | (Suzuki et al. 1997)                         | WISH probes       |
| <i>nLacZ</i>                 | (Gammill & Sive 2000)                        | mRNA              |
| <i>Otx2</i>                  | (Lamb et al. 1993)                           | WISH probes       |
| <i>Pax3</i>                  | (Monsoro-Burq et al. 2005)                   | WISH probes       |
| <i>Pfkfb1</i>                | (Pegoraro et al. 2013)                       | WISH probes       |
| <i>Pfkfb3</i>                | (Pegoraro et al. 2013)                       | WISH probes       |
| <i>Pfkfb4</i>                | (Pegoraro et al. 2013; Pegoraro et al. 2015) | mRNA; WISH probes |
| <i>Snai2</i>                 | (Grammer et al. 2000)                        | WISH probes       |
| <i>Sox2</i>                  | (Mizuseki et al. 1998)                       | WISH probes       |
| <i>Sox9</i>                  | (Spokony et al. 2002)                        | WISH probes       |
| <i>Sox10</i>                 | (Aoki et al. 2003)                           | WISH probes       |
| <i>Tfap2a</i>                | (de Croz e et al. 2011)                      | mRNA              |
| <i>Twist</i>                 | (Hopwood et al. 1989a)                       | WISH probes       |
| <i>Wnt7b</i>                 | (Grammer et al. 2000)                        | mRNA              |
| <i>Zic1</i>                  | (Mizuseki et al. 1998)                       | WISH probes       |

Morpholinos

| Morpholino                    | Sequence                   |
|-------------------------------|----------------------------|
| <i> catenin</i> MO            | (Heasman et al. 2000)      |
| <i>Fgf8</i> MO                | (Monsoro-Burq et al. 2003) |
| <i>Pax3</i> MO                | (Monsoro-Burq et al. 2005) |
| <i>Pfkfb4</i> MO              | (Pegoraro et al. 2015)     |
| <i>SensePhoto-xIPfkfb4_MO</i> | AAAGGTAATGGPTTGTGGGATGG    |
| <i>Tfap2a</i> MO              | (Luo et al. 2003)          |
| <i>Sox9</i> MO                | (Spokony et al. 2002)      |

### Primers for quantitative real-time PCR

| qRT-PCR Primer pair          | Fwd/rev    | Sequence                                              | Reference               |
|------------------------------|------------|-------------------------------------------------------|-------------------------|
| <i>EF1alpha</i>              | Fwd<br>Rev | ACACTGCTCACATTGCTTGC<br>AGAAGCTCTCCACGCACATT          | (Pegoraro et al. 2015)  |
| <i>Epidermal Keratin K81</i> | Fwd<br>Rev | GGAGGGAGGACTGGGACAGGTGAC<br>GAAACAACCTTCCCATCAACCACCT | (Pegoraro et al. 2015)  |
| <i>FoxD3</i>                 | Fwd<br>Rev | GTGCGTCCCCTTGTCAAGAA<br>TGCGAGTGCCTTCAAATCCT          | This study              |
| <i>MyoD</i>                  | Fwd<br>Rev | TACACTGACAGCCCCAATGA<br>TGCAGAGGAGAACAGGGACT          | (Krieg et al. 1989)     |
| <i>N-cadherin</i>            | Fwd<br>Rev | CTGGCAGCAGGACTAGACAG<br>GGGTTTCCTTCCATGTCCGT          | This study              |
| <i>ODC</i>                   | Fwd<br>Rev | CATGGCATTCTCCCTGAAGT<br>TGGTCCCAAGGCTAAAGTTG          | (Milet et al. 2013)     |
| <i>Pax3</i>                  | Fwd<br>Rev | CAAGCTCACAGAGGCGCGAGT<br>AGCTGGCATAGCTGCAGGAGG        | (Pegoraro et al. 2015)  |
| <i>Pfkfb1</i>                | Fwd<br>Rev | AGTGCTGAAACTGACCCCTG<br>TCATCTGGCTCACGGGAAAC          | (Pegoraro et al. 2013)  |
| <i>Pfkfb2</i>                | Fwd<br>Rev | TGTCGGGAGGATTGGAGGAGATTCA<br>GACACACCAAGGGCTTCTGCCGT  | (Pegoraro et al. 2013)  |
| <i>Pfkfb3</i>                | Fwd<br>Rev | GCTGAGAGTGGCTGCCGCTT<br>TGGAATCTGAGTGTGTGGACCCT       | (Pegoraro et al. 2013)  |
| <i>Pfkfb4-3</i>              | Fwd<br>Rev | TGGAATCTGAGTGTGTGGACCCT<br>CGGTTGCCTCCTCGCTGCTAC      | (Pegoraro et al. 2013)  |
| <i>Snai2</i>                 | Fwd<br>Rev | CACACGTTACCCTGCGTATG<br>TCTGTCTGCGAATGCTCTGT          | (Nichane et al. 2008)   |
| <i>Twist</i>                 | Fwd<br>Rev | AATGCCACTACAGCTCAGGC<br>GCCCTTCTCCCTTAAACGC           | (Plouhinec et al. 2014) |

### Antibodies

| Antibody                                                    | Reference                           | Host   | Dilution | Usage |
|-------------------------------------------------------------|-------------------------------------|--------|----------|-------|
| Anti-actin                                                  | Sigma # A2066                       | Rabbit | 1/2000   | WB    |
| Anti-Akt                                                    | Cell signaling #9272                | Rabbit | 1/1000   | WB    |
| Anti-cleaved Caspase-3 (D175)                               | Cell signaling #9661L               | Rabbit | 1/500    | IHC   |
| Anti-digoxigenin-AP                                         | Roche #11 093 274 910               | sheep  | 1/4000   | WISH  |
| Anti-GFP Living Colors A.v. Peptide Antibody                | Clontech #632377                    | Rabbit | 1/500    | IF    |
| Anti-phospho-Akt(Ser472)(D9E)XP                             | Cell signaling #4060S               | Rabbit | 1/2000   | WB    |
| Alkaline Phosphatase AffiniPure Goat Anti-Rabbit IgG (H+L)  | Jackson ImmunoResearch #111-035-003 | Rabbit | 1/500    | IHC   |
| Peroxidase conjugated affiniPure Goat anti-Rabbit-IgG (H+L) | Jackson ImmunoResearch #111-055-003 | Rabbit | 1/200000 | WB    |

### Pharmacological treatments and lactate dosage

| Pharmacological reagents /kits | Reference    | Concentration         | usage                     |
|--------------------------------|--------------|-----------------------|---------------------------|
| LY294002                       | Sigma #L9908 | 40 $\mu$ M-80 $\mu$ M | PI3K/Akt blockade assay   |
| 2-Deoxyglucose                 | Sigma #D8375 | 100-200mM             | Glycolysis blockade assay |

bioRxiv preprint doi: <https://doi.org/10.1101/168807>; this version posted July 26, 2017. The copyright holder for this preprint (which was not certified by peer review) is the author/funder. All rights reserved. No reuse allowed without permission.

|                                          |                    |               |                     |
|------------------------------------------|--------------------|---------------|---------------------|
| UO126                                    | Sigma #19147       | 40-80 $\mu$ M | MAPK/Erk inhibition |
| L-Lactate Assay Kit                      | Abcam #AB65330     |               | Lactate dosage      |
| Click-iT EdU Alexa Fluor 555 Imaging kit | Invitrogen #C10338 |               | Proliferation assay |



873 **SUPPLEMENTARY FIGURES LEGENDS.**

874

875 **Fig. S1. Schematics of glycolysis.** Glucose phosphorylation by hexokinase is the first irreversible  
876 step of glycolysis. The second and rate-limiting step of glycolysis is catalyzed by PFK1. This step is  
877 tightly controlled in cells, by the levels of Fructose-2,6-bisphosphate, potent allosteric regulator of  
878 PFK1. Fructose-2,6-bisphosphate is synthesized by PFKFB1-4 enzymes, which thus control the rate  
879 of glycolysis in the cells. PFKFB3 and PFKFB4, with a strong kinase activity over their phosphatase  
880 activity, promote Fructose-2,6-bisphosphate synthesis and stimulate glycolysis. In addition to their  
881 classic role in glycolysis regulation, recent unconventional roles of the PFKFB enzymes have been  
882 described in cancer or development (see text).

883

884 **Fig. S2. *Pfkfb4* is specifically upregulated in the neural border and neural crest during**  
885 **neurulation.** (A-J). Transverse sections through the anterior neural plate at mid and late neurula  
886 stages (stage 14 and 18, respectively) allow comparing *Snail2* and *Pfkfb4* expression in the neural  
887 crest (*Snail2* and *Pfkfb4*), neural plate (*Pfkfb3*) and somites (*Pfkfb1*). (A,F): The notochord, neural  
888 plate and paraxial mesoderm are outlined on hematoxylin-eosin stained paraffin sections. (B-E,G-J)  
889 Vibratome sections of WISH-stained embryos. The arrow indicates the midline and the notochord.  
890 The blue arrowheads indicate in situ hybridization staining position. Red bar positions the neural  
891 border at stage 14. Scale bar = 200 $\mu$ m. (K) A quantitative analysis of *Xenopus laevis Pfkfb1-4*  
892 expression levels shows that *Pfkfb4* is specifically enriched at the neural border of frog neurulas (red),  
893 compared to the anterior neural fold (yellow). All values are normalized to *Odc* expression and to the  
894 average expression in a sibling whole embryo lysed at late neurula stage 18 (blue, value = 1). *Snail2*  
895 expression is used to monitor the quality of dissected tissues and shows high and specific expression  
896 at the neural border.

897 **Fig. S3. Patterning defects in NC are not due to increased cell death, after low-level PFKFB4**  
898 **depletion in vivo.** In this study, we use a low-level depletion of PFKFB4, with reduced MO  
899 concentrations, in order to bypass the earlier developmental arrest observed in previous study, when  
900 PFKFB4 severely depleted (above 60% mRNA depletion) and prevents gastrulating ectoderm  
901 specification (Pegoraro et al., 2015). Importantly, this severe depletion was rescued by adding back a  
902 MO-resistant *pfkfb4* mRNA, assessing both MO specificity and lack of non-specific toxicity (Pegoraro  
903 et al., 2015). (A) Here, we check that the morphant cells do not undergo elevated cell death at later  
904 stages of development by analyzing mid-neurulas at stage 14 and the end of neurulation stage 18. (B-  
905 C) We find less than 30% of embryos with caspase-positive cells in the lacZ-injected area (B), in

906 conditions when over 70% of sibling embryos show deficient *twist* expression (C, either "strong",  
907 "moderate" or "mild" decrease). The number of caspase-positive cells is slightly more elevated than in  
908 uninjected or lacZ-only-injected embryos, or in ventrally-injected morphants, but it remains limited to  
909 few cells and cannot account for the incidence of the patterning defects. Representative examples of  
910 the majoritary phenotypes are shown for each condition, i.e. "rare" or "+/-" phenotypes. Embryos  
911 analyzed in this experiments: uninjected, n=49; lacZ-injected, n=46; PFFB4misMO-injected, n=16;  
912 PFKFB4MO-injected, n=43.

913

914 **Fig. S4. PFKFB4 is required for neural crest migration.** (A,D) WISH analysis of neural crest  
915 migration at tadpole stages. When *Pfkfb4* MO is injected, embryos display decreased *Twist*  
916 expression and neural crest migration defects (B), when compared to control embryos (A). (C) In  
917 contrast, the co-injection of *Pfkfb4* mRNA with *Pfkfb4* MO restores *Twist* expression and NC  
918 migration, showing that the neural crest migration defects are due to PFKFB4 knockdown. A-C are  
919 side views, anterior is to the right.

920

921 **Fig. S5. PFKFB4 depletion and 2DG treatment block glycolysis, LY294002 blocks AKT**  
922 **phosphorylation.** (A) PFKFB4 low-level depletion affects lactate levels in embryos, indicating  
923 efficient glycolysis blockade. (B, C) Lactate concentration and Akt phosphorylation were decreased  
924 following 2-DG or LY294002 treatment (LY, two doses 60-80  $\mu$ M), respectively. Error bars represent  
925 s.e.m (t-test  $p < 0.05$ ). (C,D) Blocking glycolysis during neurulation, between st. 14 and st. 18 does not  
926 affect *twist* expression *in vivo*. (D) control and (E) 2DG-treated embryos displayed normal *twist*  
927 expression (n=15 each).

928

929 **Fig. S6. Glycolysis and PI3K-Akt signaling control neural crest migration.** Glycolysis blockade  
930 (A-J) and PI3K-Akt blockade (K-T) during EMT and neural crest migration (stage 18 to stage 24)  
931 affects neural crest migration as shown by the expression of *Sox9*, *Sox10* and *Twist*. Embryos rinsed  
932 at stage 24 and grown until stage 45 display craniofacial and eye development defects, albeit the  
933 presence of all individual cartilage elements. (A-C,F-H,K-M,P-R, U-W) Side views, anterior is to the  
934 left. (D,I,N,S,X) dorsal views st 45. (E,J,O,T,Y) Ventral views of alcian blue stained visceral cartilages,  
935 st 45. Scale bar= 500 $\mu$ m.

936

937 **Fig. S7. *Pfkfb4* is regulated by the neural crest gene regulatory network.** Unilateral  
938 overexpression of members of the neural crest gene regulatory network modulates *Pfkfb4* expression  
939 at mid and late neurula stages (stage 14 and 18, respectively). (A-D) Overexpression of WNT signals

940 increases both *Snail2* and *Pfkfb4* expression. (E-H) FGF8 overexpression results in complete loss of  
941 *pfkfb4*, while *snai2* is expanded. (I-L) BMP overexpression with a constitutively active form of BMPR1  
942 results in loss of *Snail2* and *Pfkfb4* expression in the NC and ectopic expression in the neural plate.  
943 (M-T) PAX3 and TFAP2a positively regulate *Pfkfb4* expression, similarly to *Snail2*. Dorsal views,  
944 anterior is to the top. Scale bar = 500 $\mu$ m.

Fig. S1

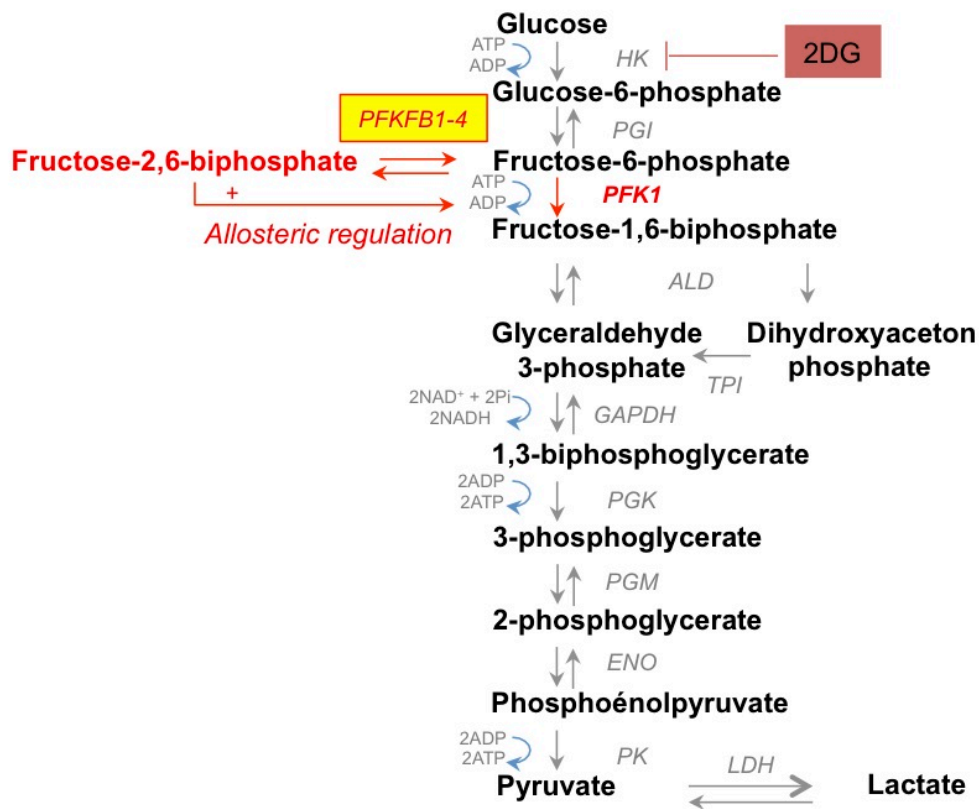

**Fig. S2**

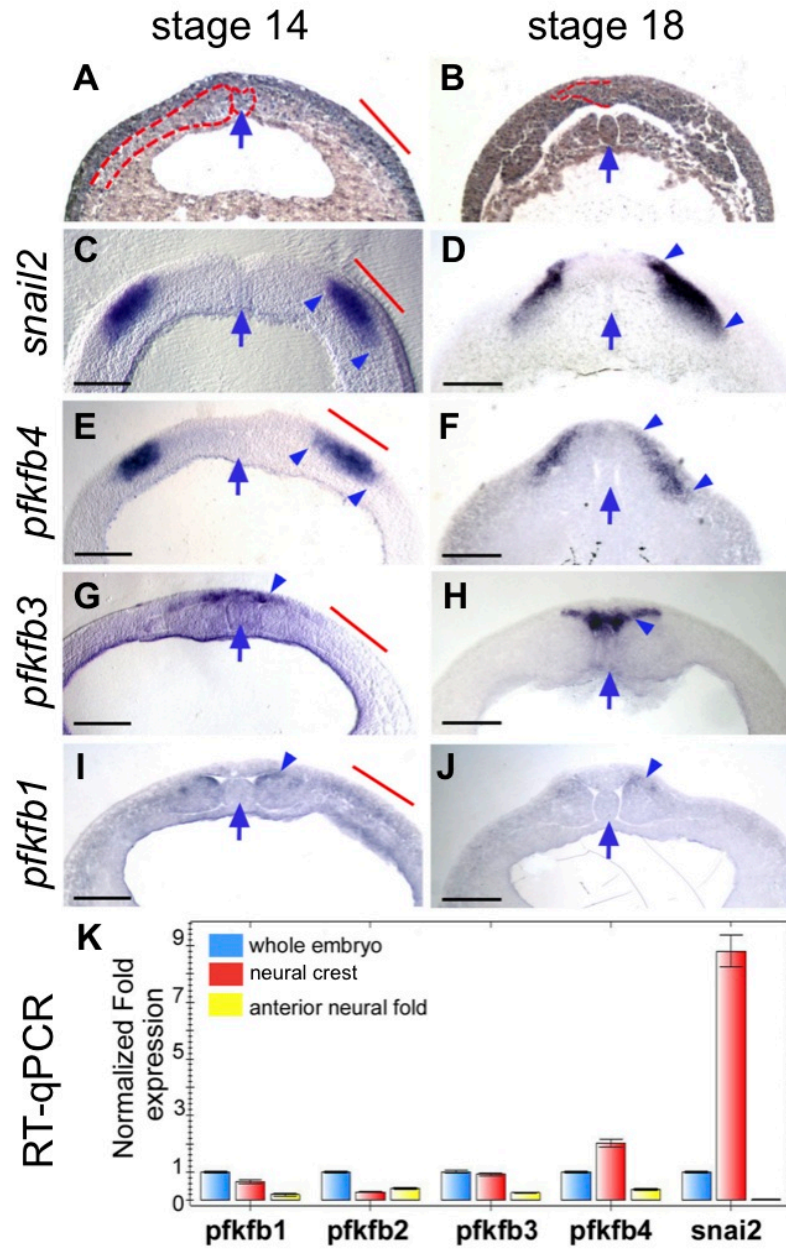

**Fig. S3**

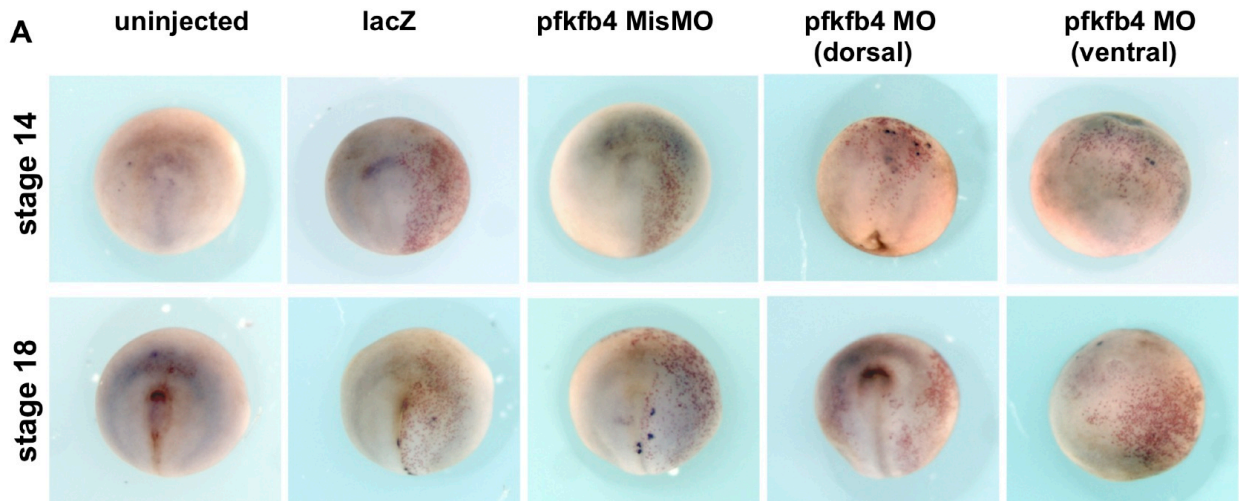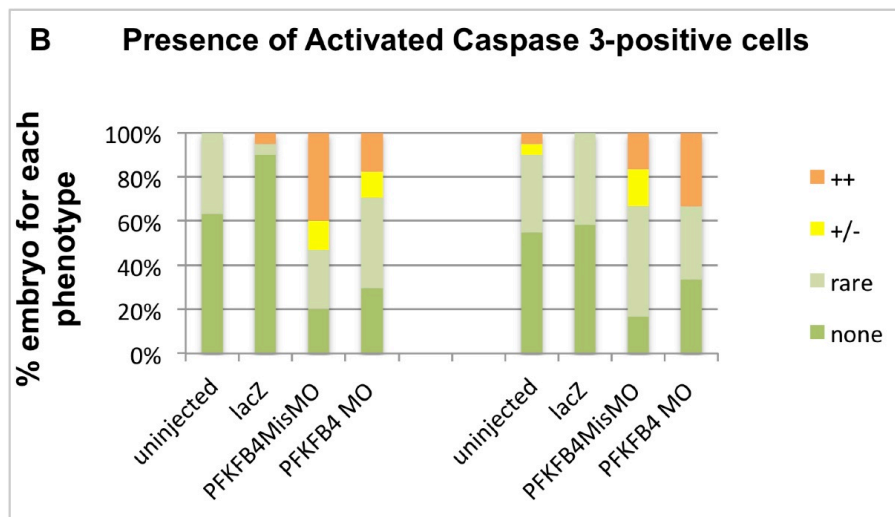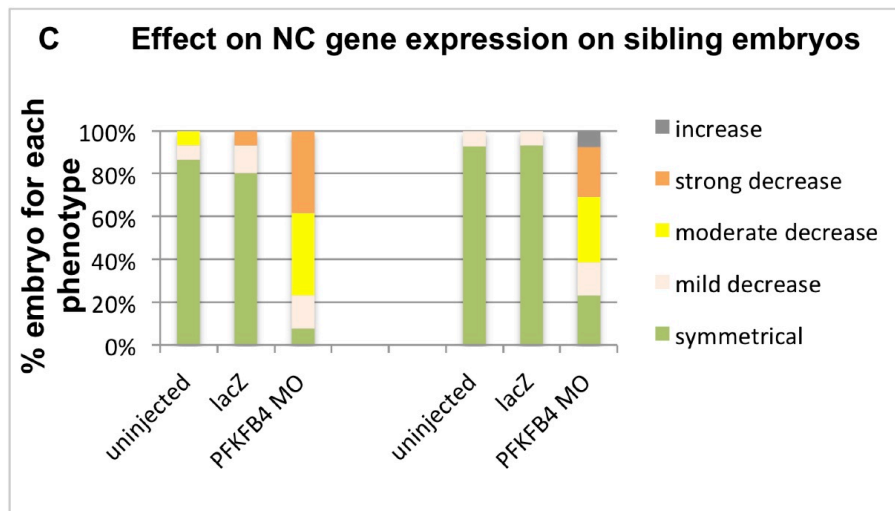

## Fig S4

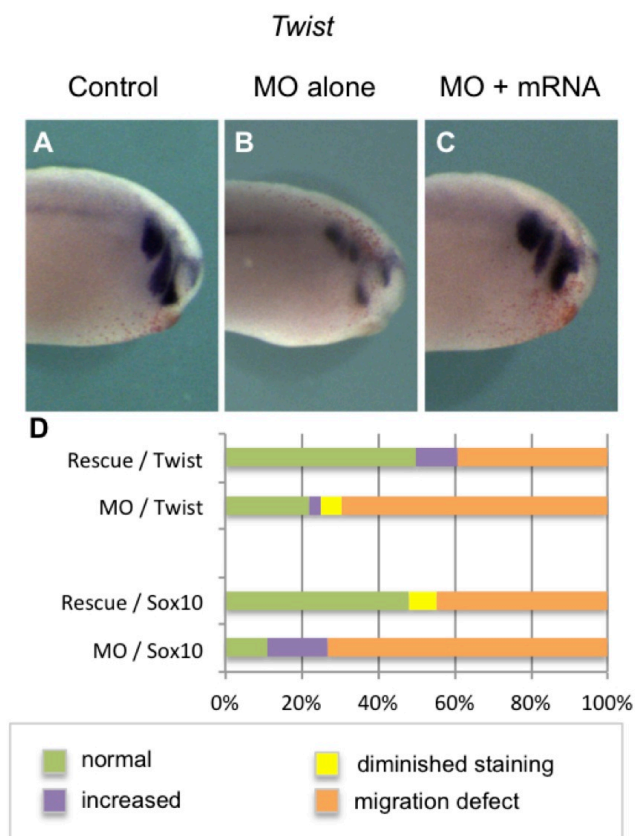

Fig. S5

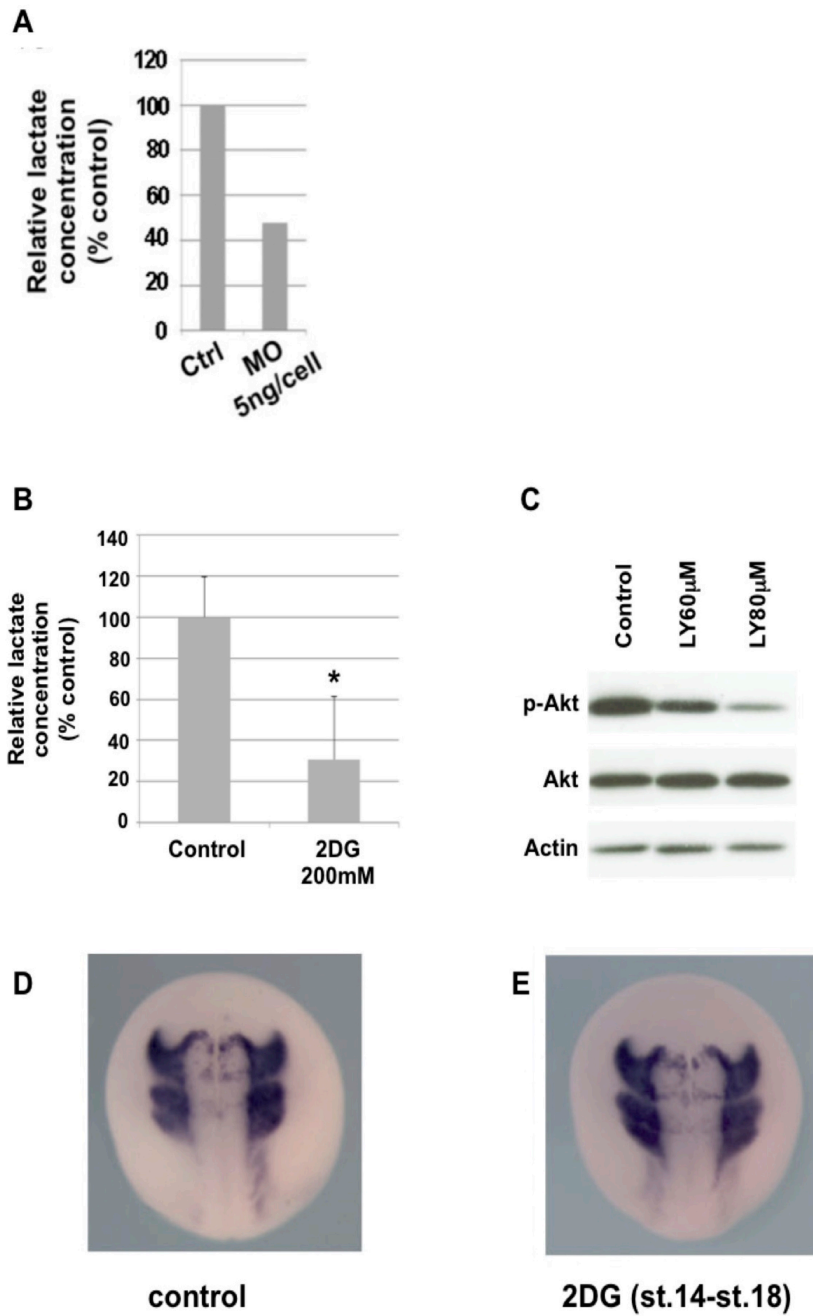



**Fig S6**

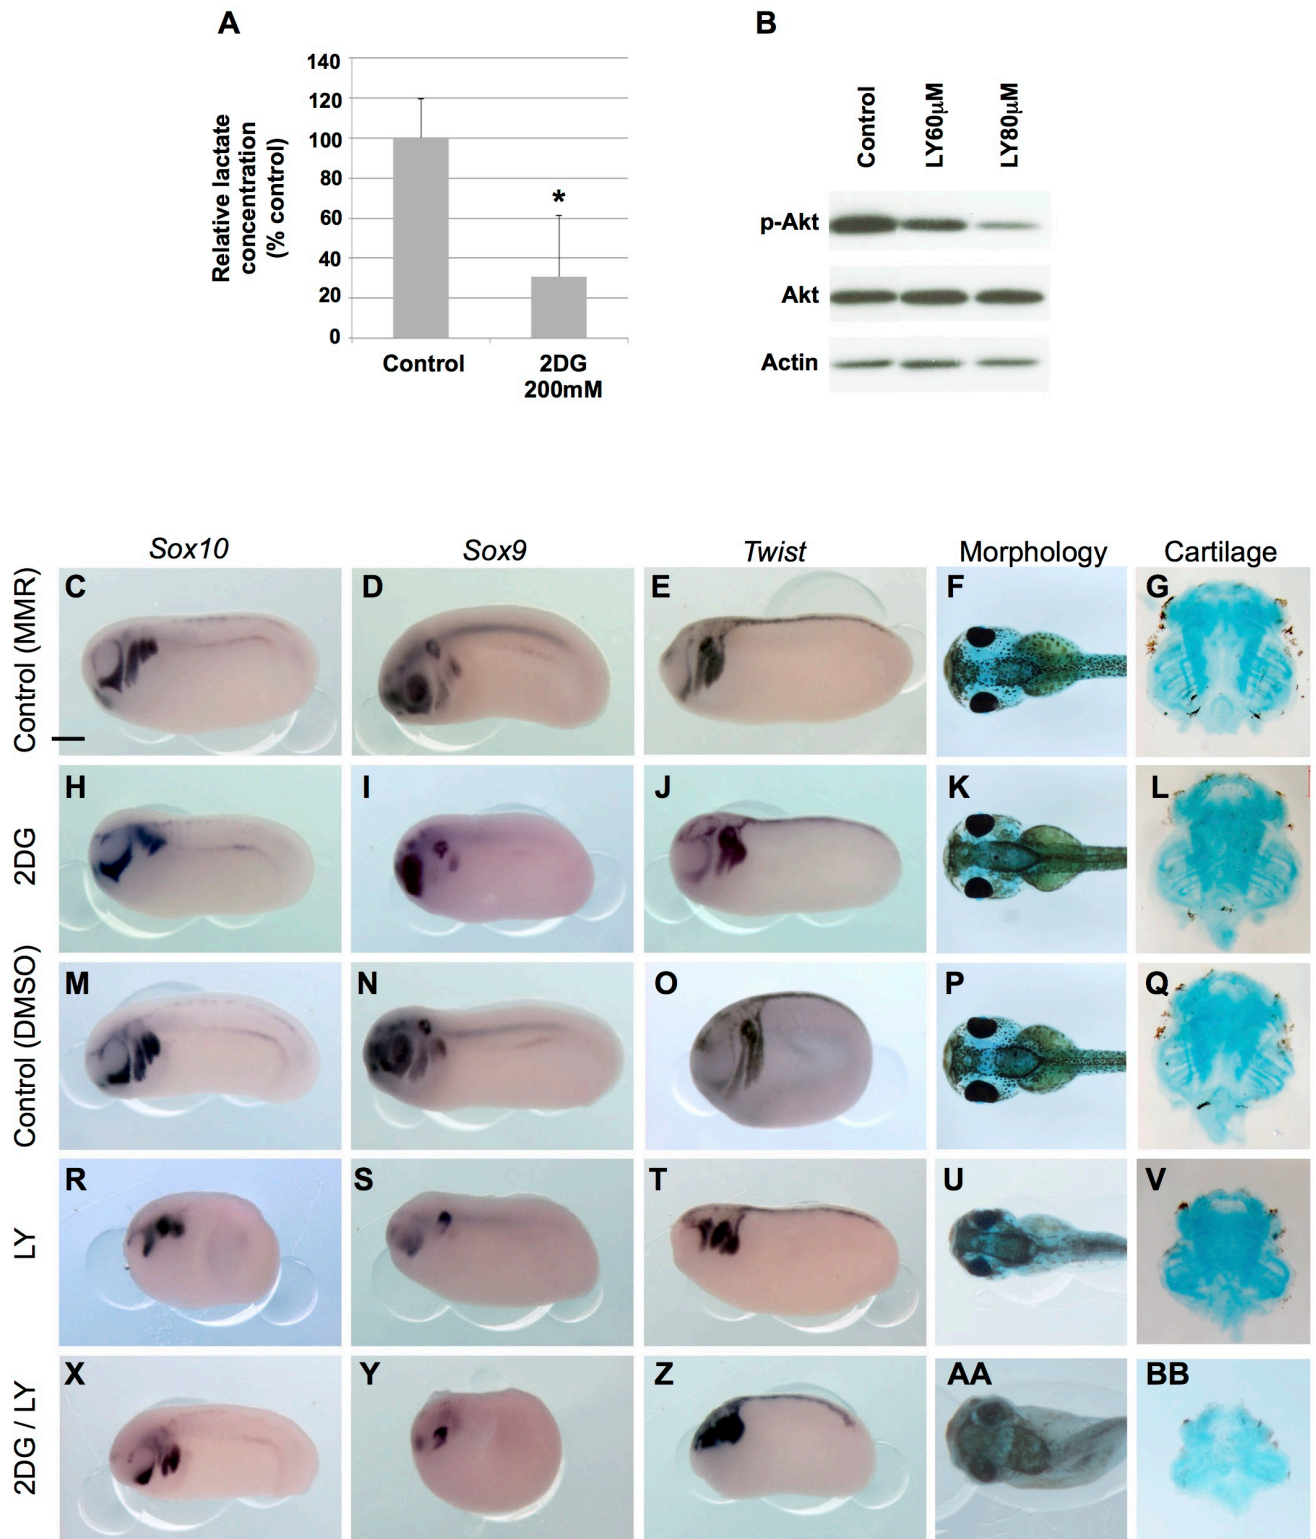

# Fig. S7

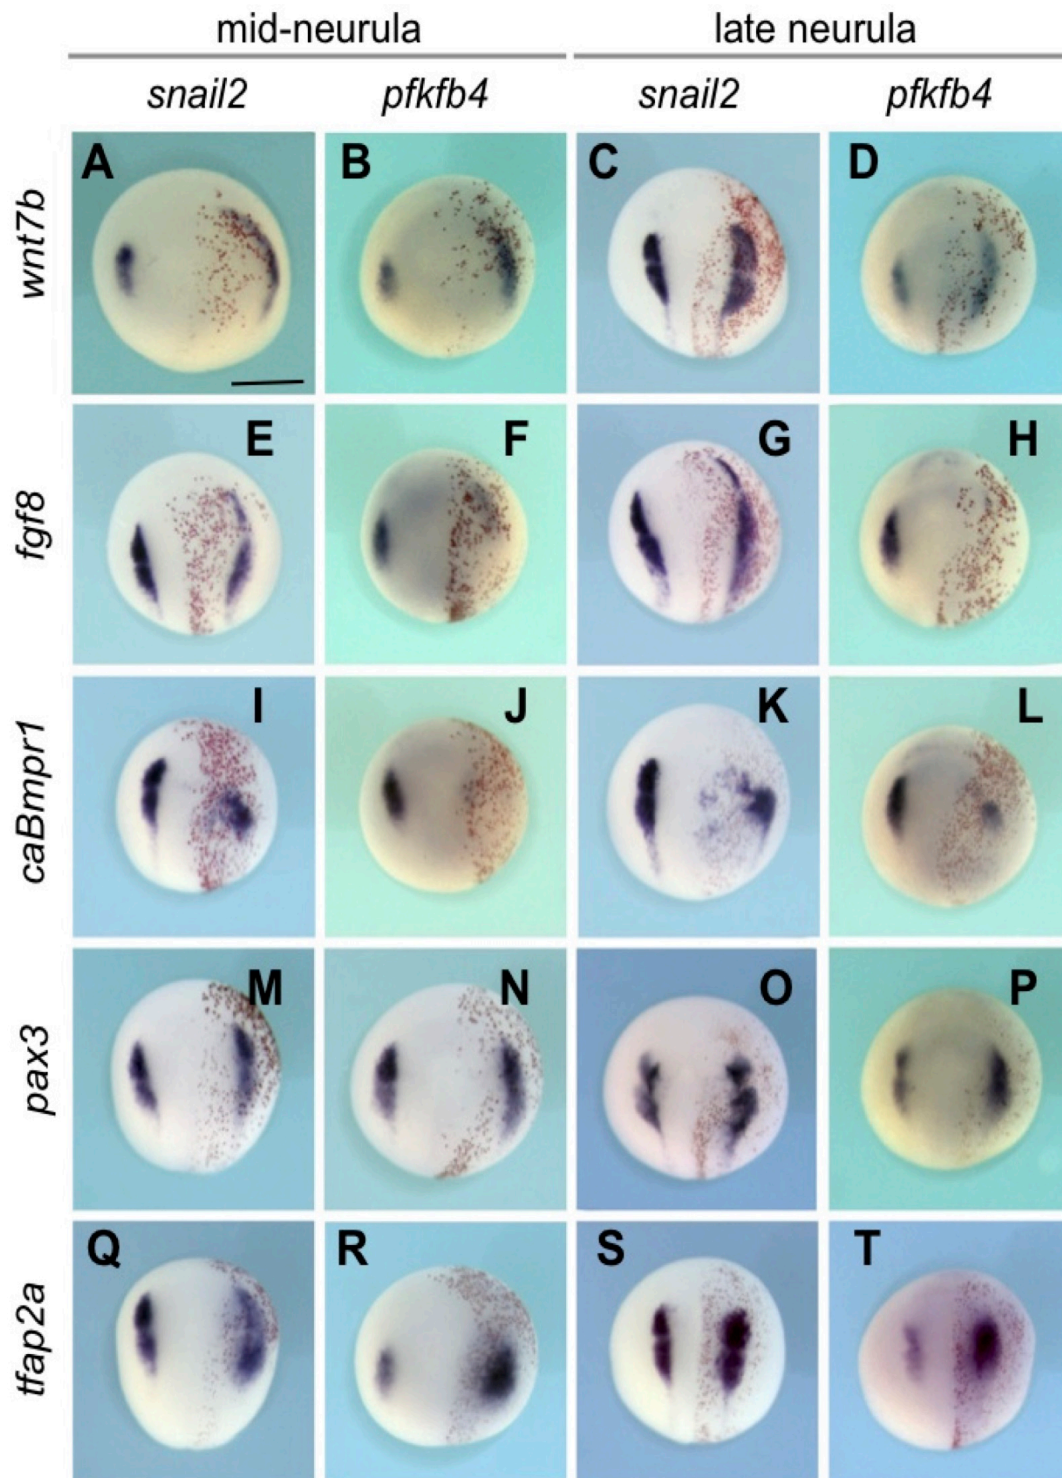

Source: https://www.biorxiv.org/content/10.1101/168807v1.full.pdf
